# Supplementary material for: ReSeq simulates realistic Illumina high-throughput sequencing data
Source: bioRxiv or medRxiv preprint supplement (doi:10.1101/2020.07.17.209072), 2020-07-17
Supplement: Supplementary file [file media-1.pdf]

# Supplementary: ReSeq simulates realistic Illumina high-throughput sequencing data

## Supplementary Figures

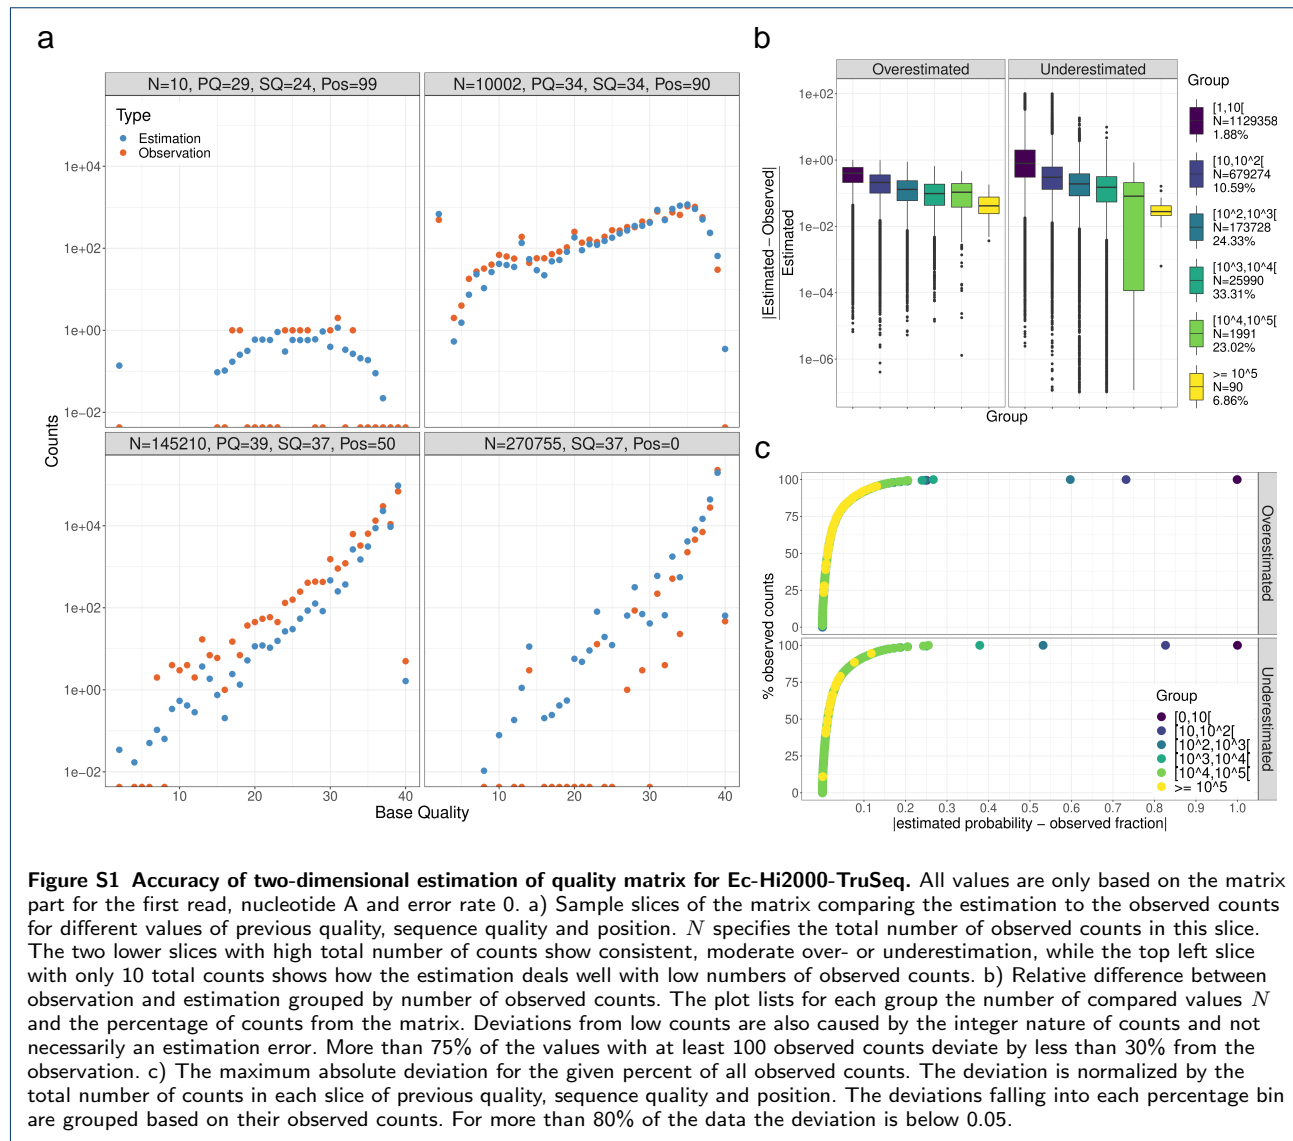

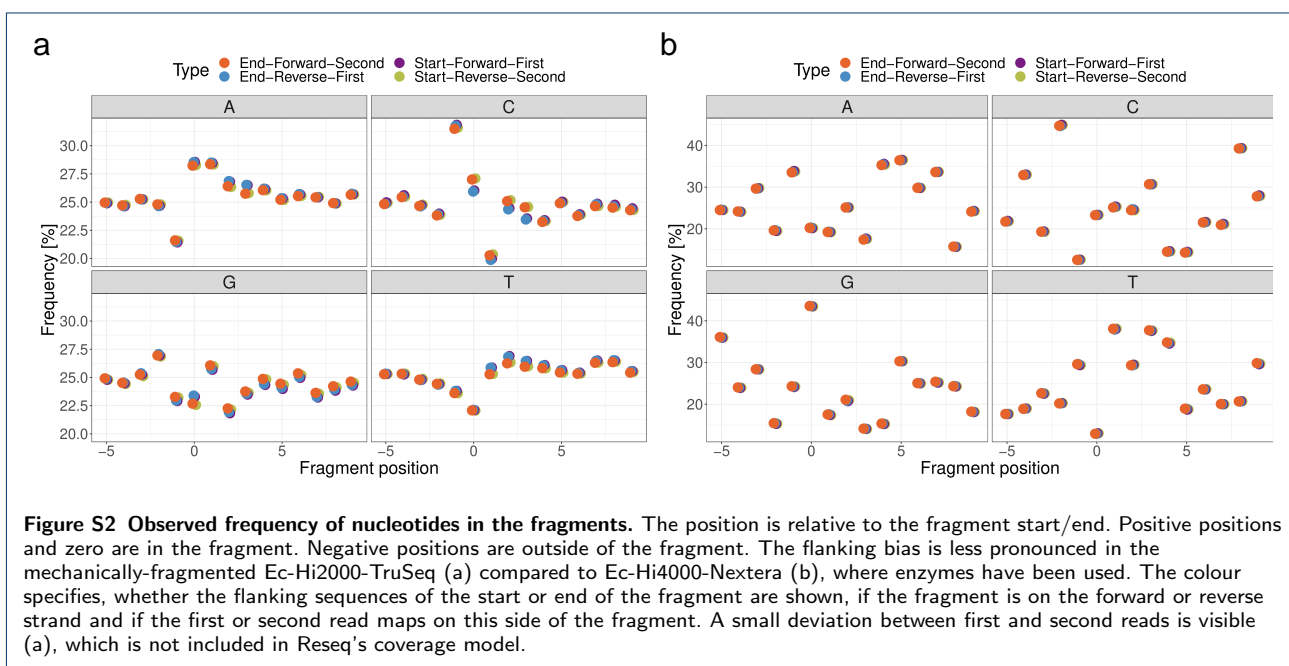

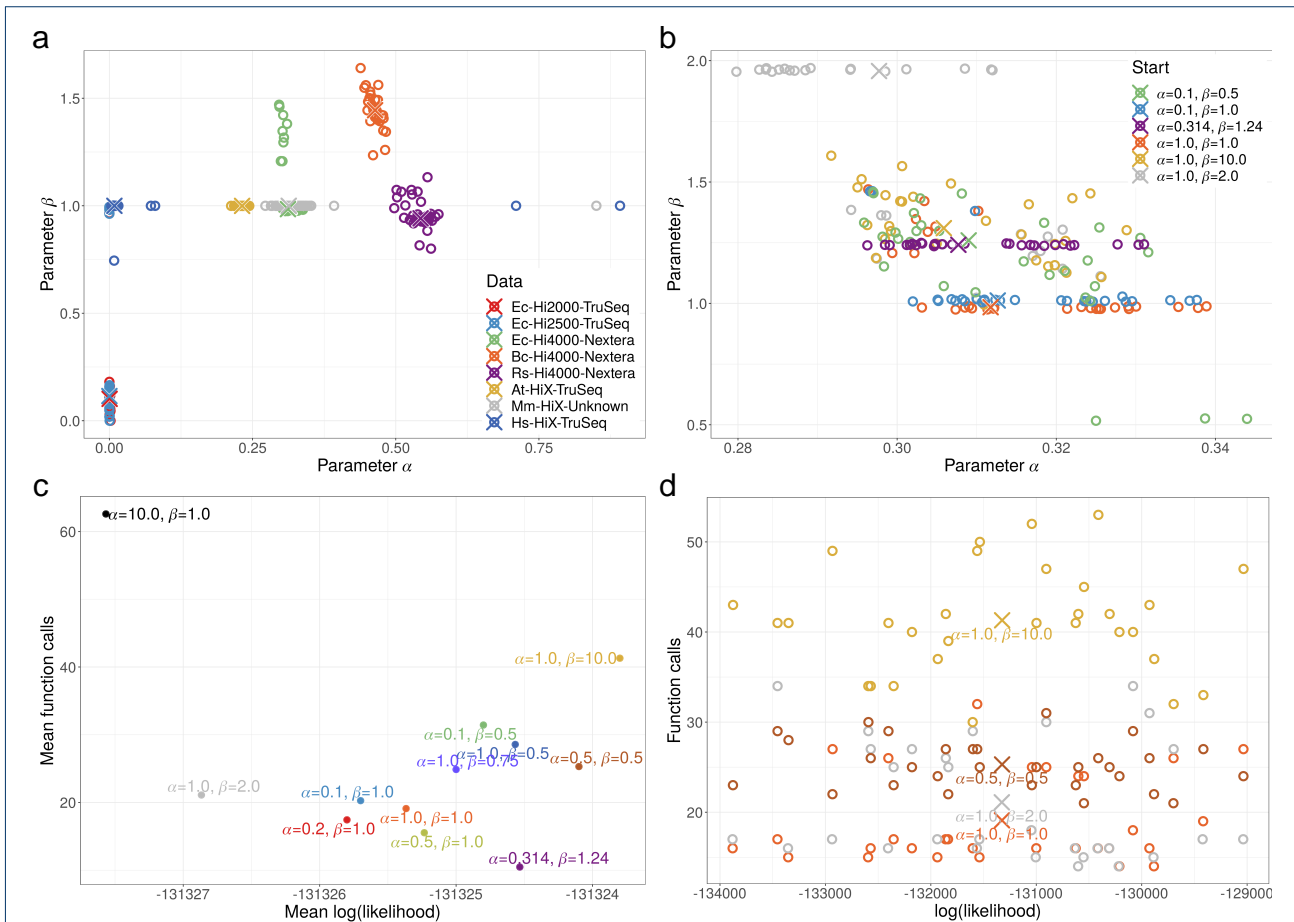

**Figure S3 Dispersion parameter overview.** a) Comparison of the resulting parameters over 8 tested datasets. Each circle is a fit. Crosses represent the median (final result) for each dataset. Ec-Hi2000-TruSeq and Ec-Hi2500-TruSeq seem to suppress parameter  $\alpha$ , while all other datasets require it. A likely explanation are patterned flow cells, which are build into newer Illumina sequencers, but not into the HiSeq2000/2500 used for those two datasets. Strong increases of optical duplicates for patterned flow cells have been reported before [1]. That parameter  $\beta$  is fixed to its start value of 1 is a precision artifact (panel b) mostly observed for low-coverage datasets. b) Converged parameters for Ec-Hi4000-Nextera depending on the start parameters. Circles are single fits and crosses medians for each set of start parameters. If parameter  $\beta$  starts too close to the optimal value, it remains in proximity of its starting value. Changing the default start parameters is not a good solution (panel c). c) Final log(likelihood) vs. total number of calls to the likelihood calculation for Ec-Hi4000-Nextera. Each dot represents the mean over all fits. Parameter  $\alpha$  has a stronger influence on the likelihood than parameter  $\beta$ . Start values further away from the optimal value are not guaranteed to increase the likelihood and often need more function calls. d) Final log(likelihood) vs. total number of calls to the likelihood calculation for Ec-Hi4000-Nextera. Each circle is a single fit and the crosses are the mean values shown in (c). The mean shift of log(likelihood) caused by different start parameters is minor compared to the spread between individual fits.

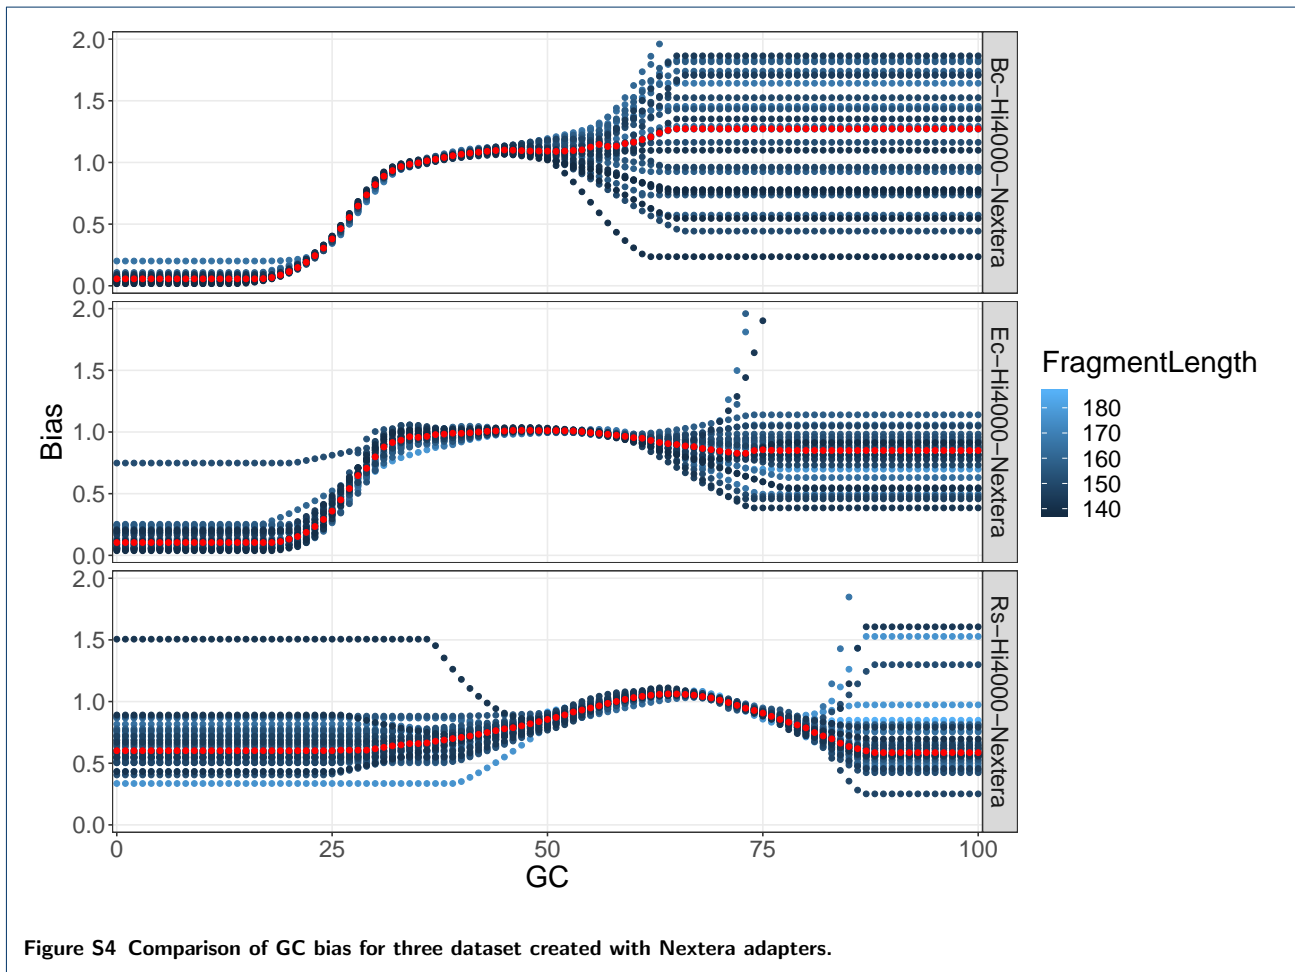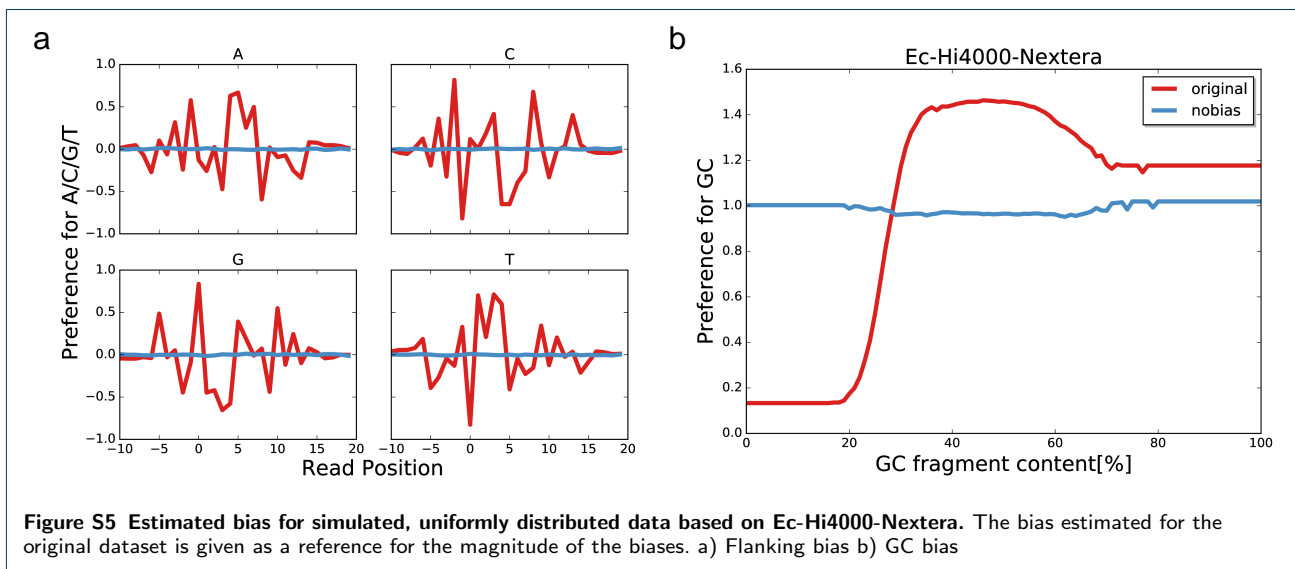

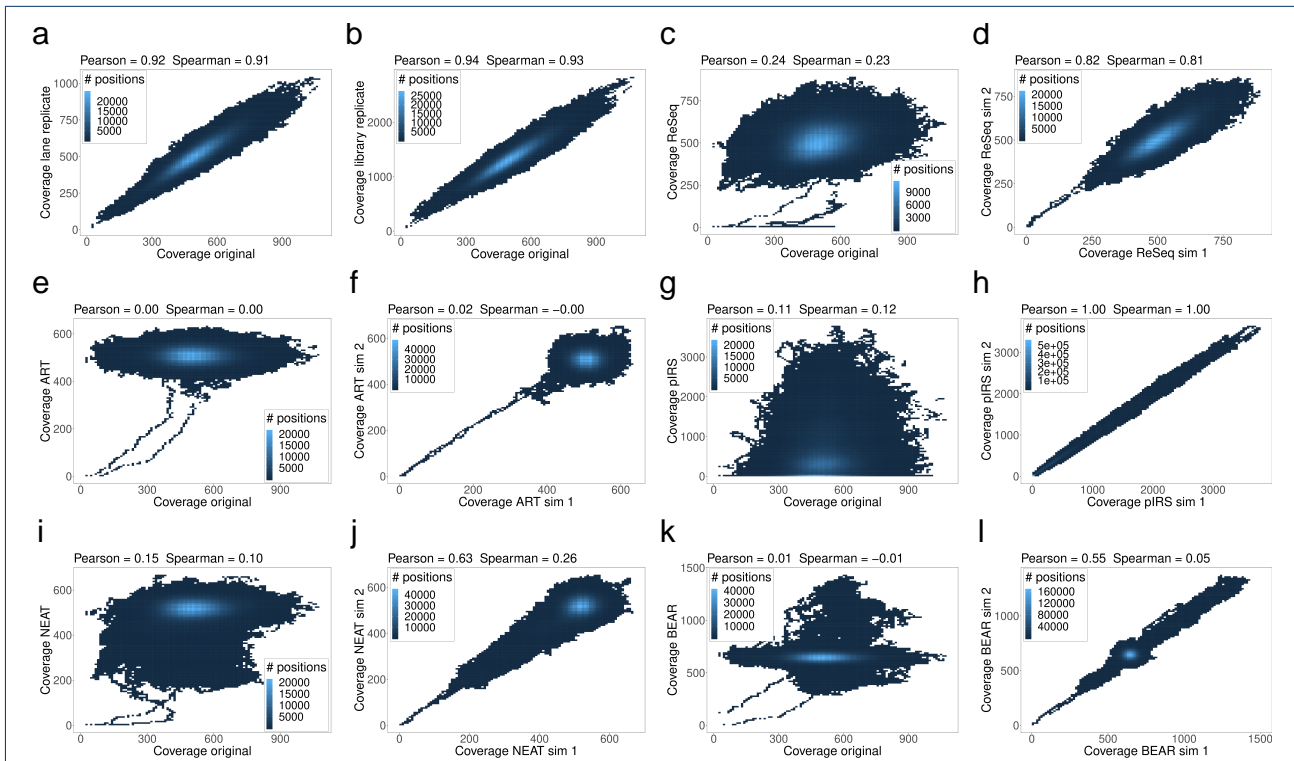

**Figure S6 Correlations of real and simulated coverages across datasets.** a) Ec-Hi4000-Nextera (Ecoli1\_L001) vs Ecoli1\_L002 b) Ec-Hi4000-Nextera (Ecoli1\_L001) vs. Ecoli2\_L001 c) Ec-Hi4000-Nextera vs. ReSeq d) ReSeq e) Ec-Hi4000-Nextera vs. ART f) ART g) Ec-Hi4000-Nextera vs. pIRS h) pIRS i) Ec-Hi4000-Nextera vs. NEAT j) NEAT k) Ec-Hi4000-Nextera vs. BEAR l) BEAR

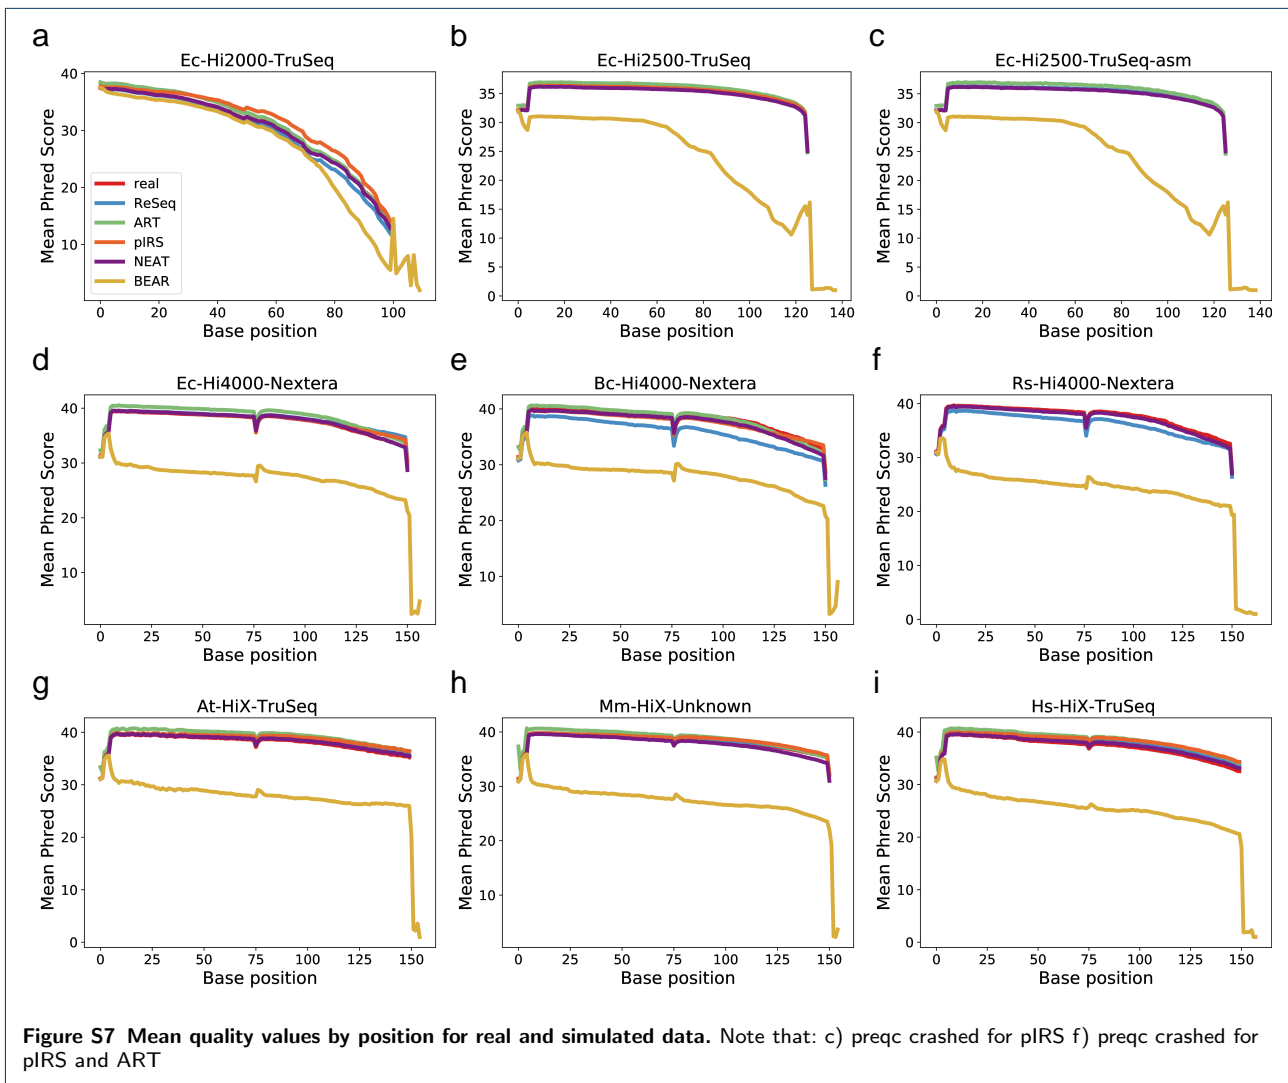

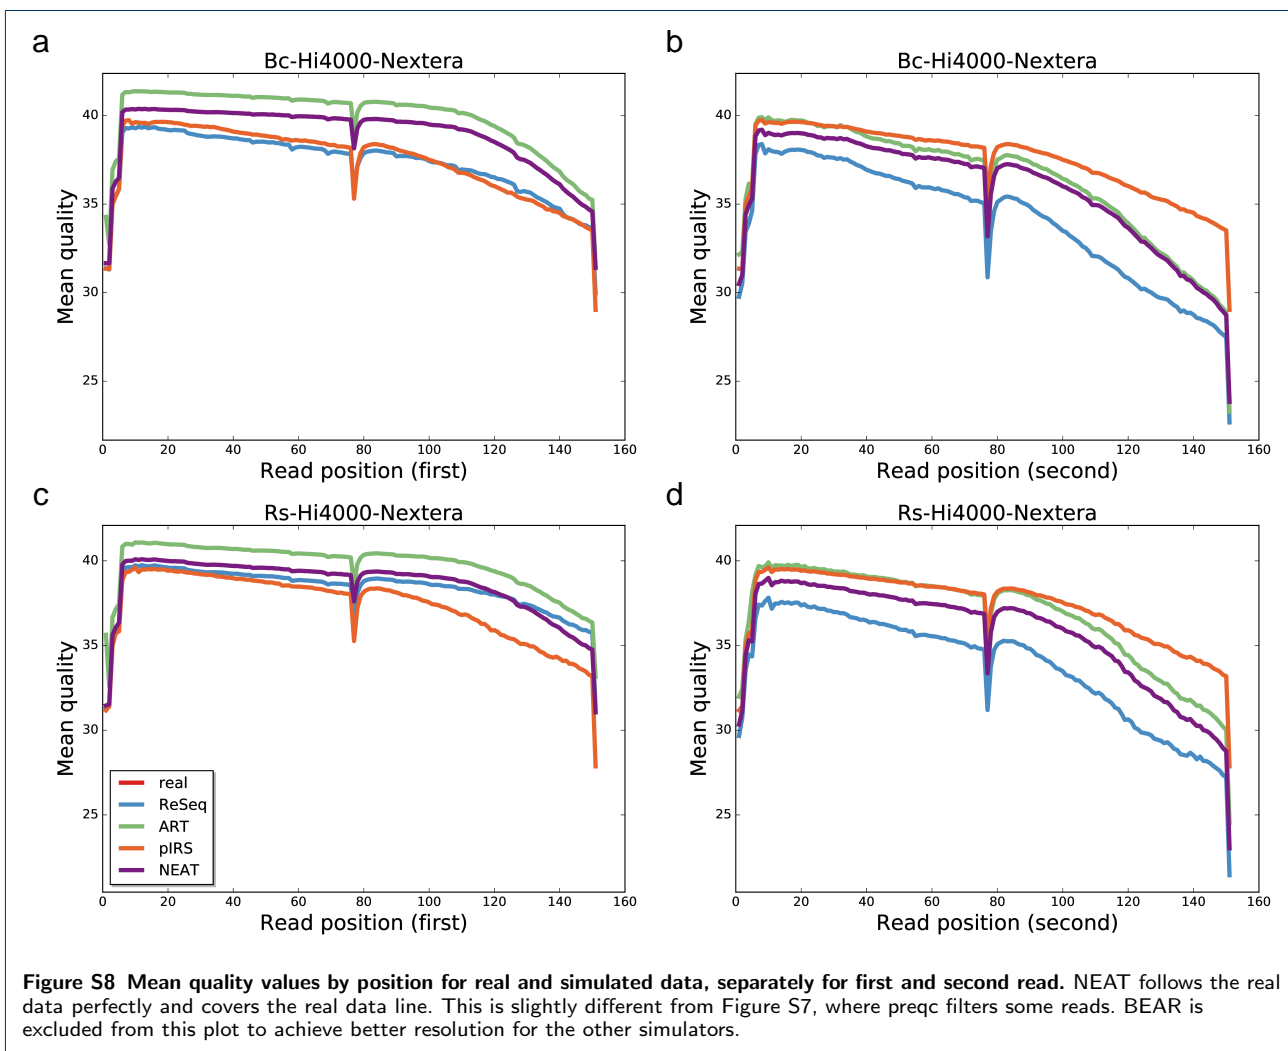

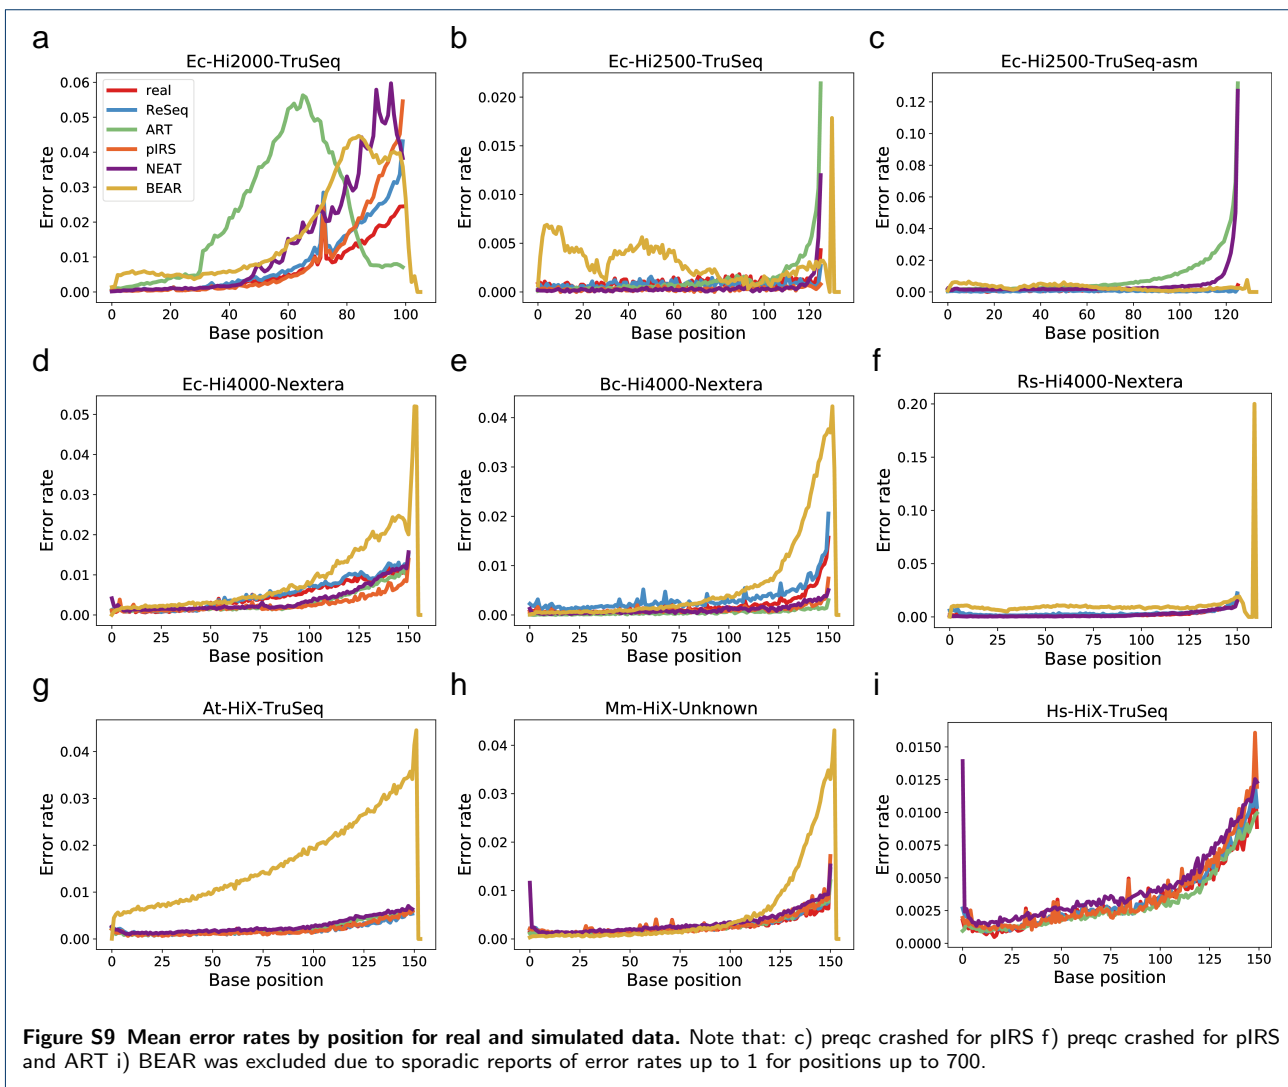



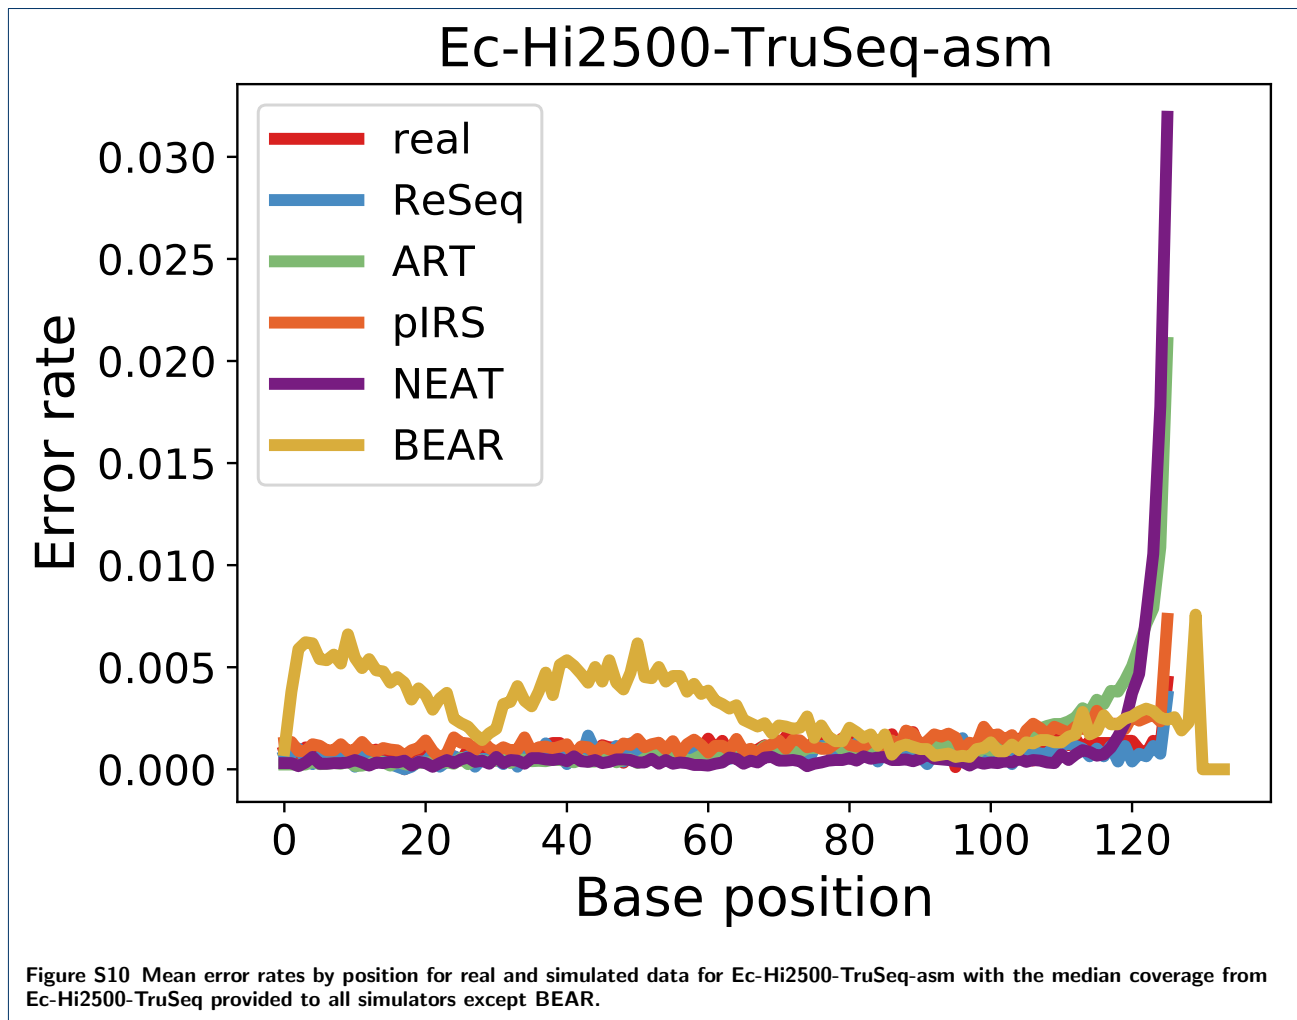

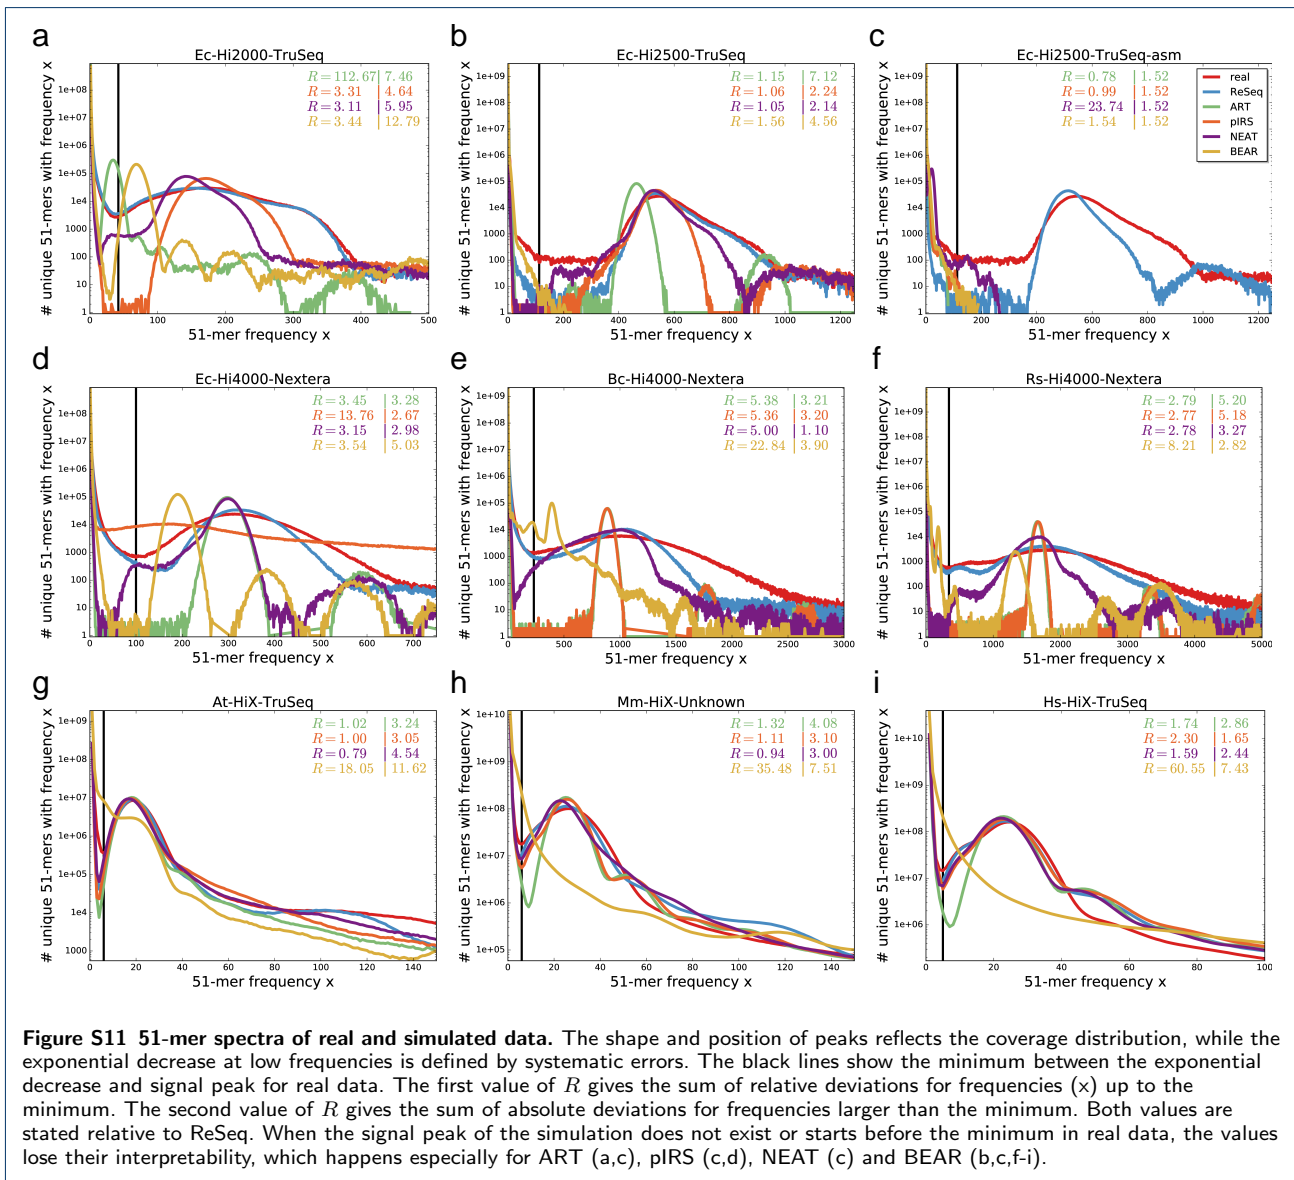

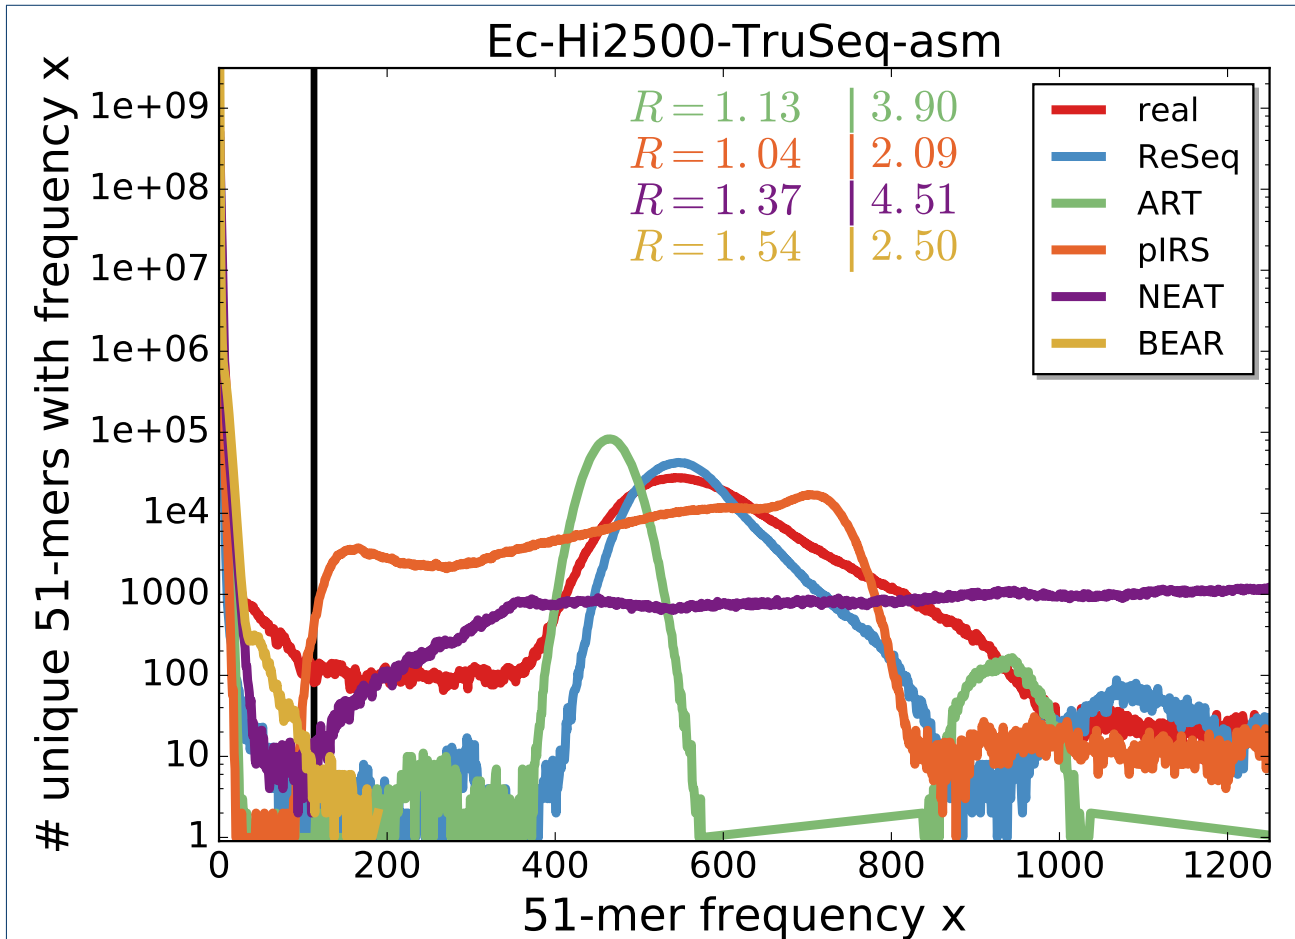

**Figure S12 51-mer spectra of real and simulated data for Ec-Hi2500-TruSeq-asm with the median coverage from Ec-Hi2500-TruSeq provided to all simulators except BEAR.** The shape and position of peaks reflects the coverage distribution, while the exponential decrease at low frequencies is defined by systematic errors. The black lines show the minimum between the exponential decrease and signal peak for real data. The first value of  $R$  gives the sum of relative deviations for frequencies ( $x$ ) up to the minimum. The second value of  $R$  gives the sum of absolute deviations for frequencies larger than the minimum. Both values are stated relative to ReSeq. When the signal peak of the simulation does not exist or starts before the minimum in real data, the values lose their interpretability, which happens for BEAR and to a smaller extent for pIRS.

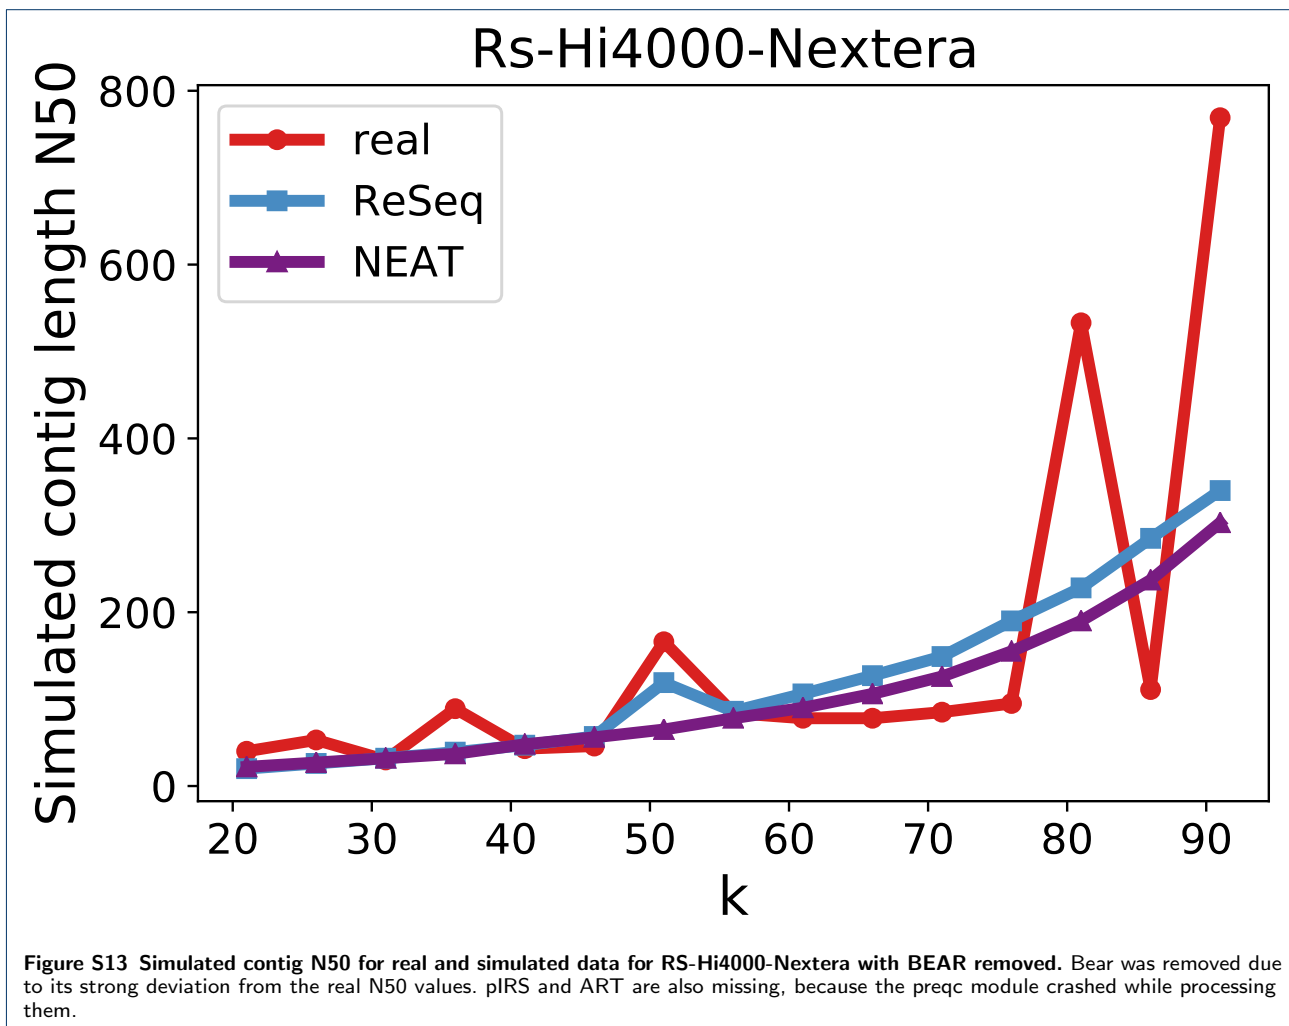

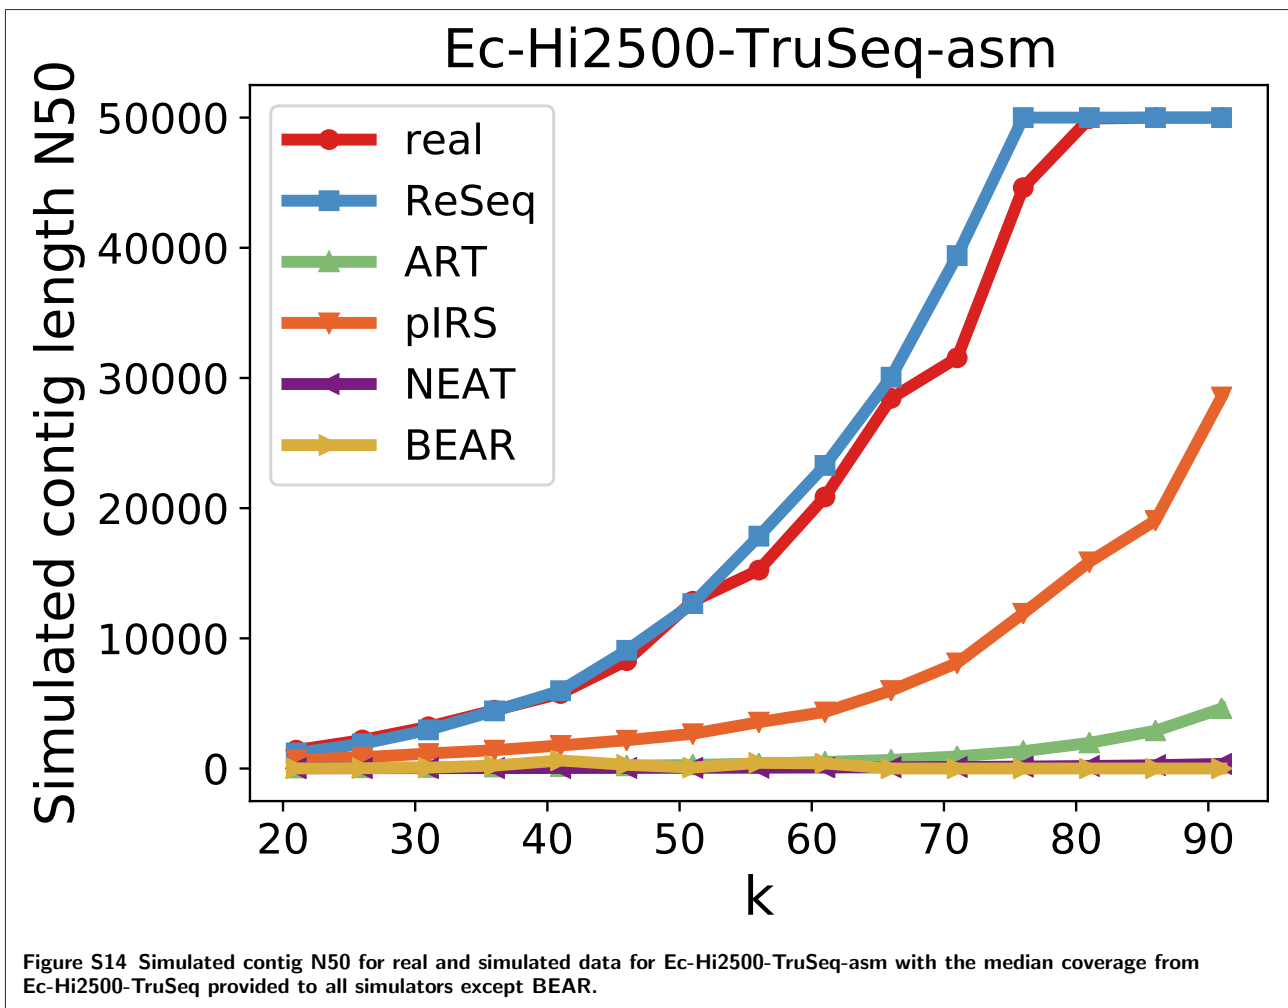

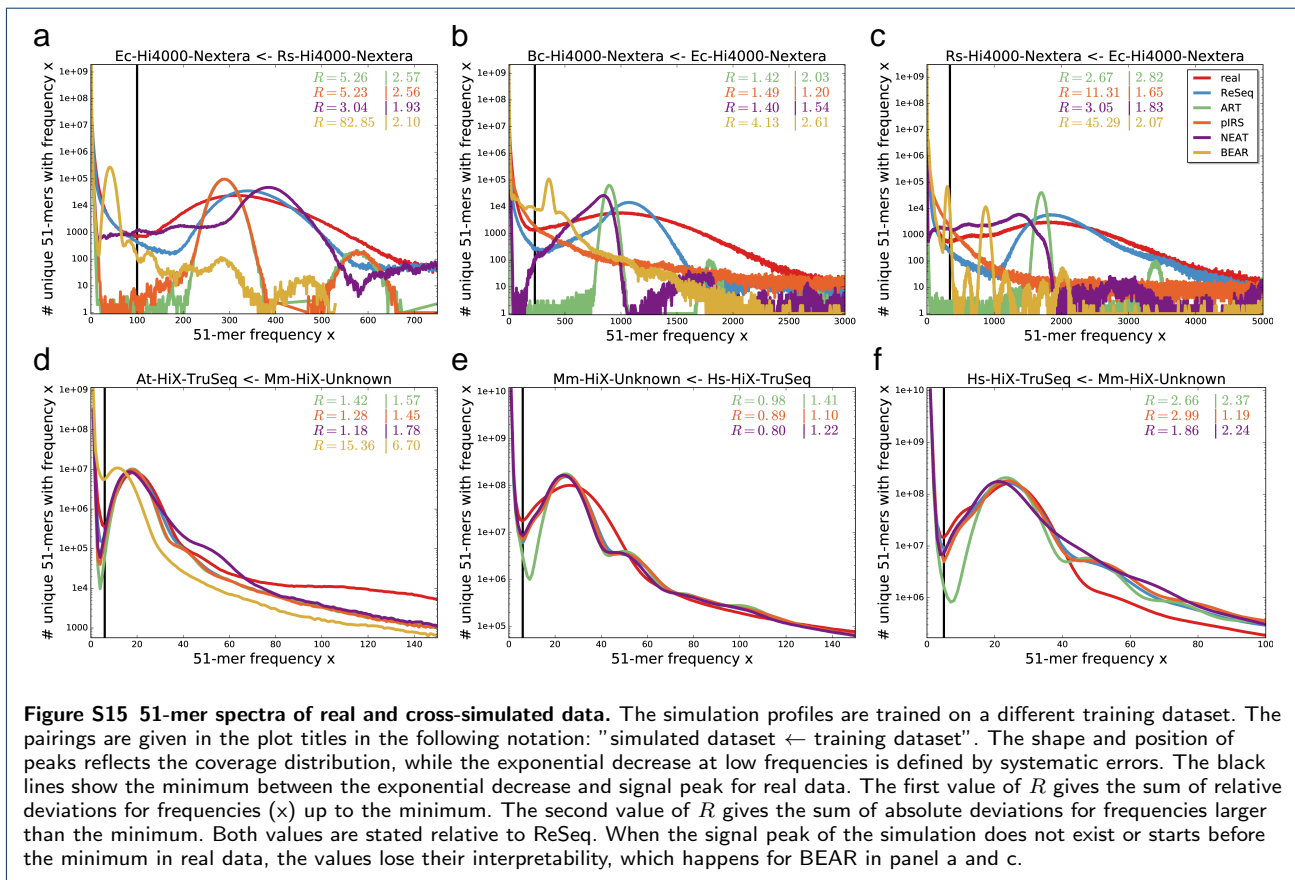

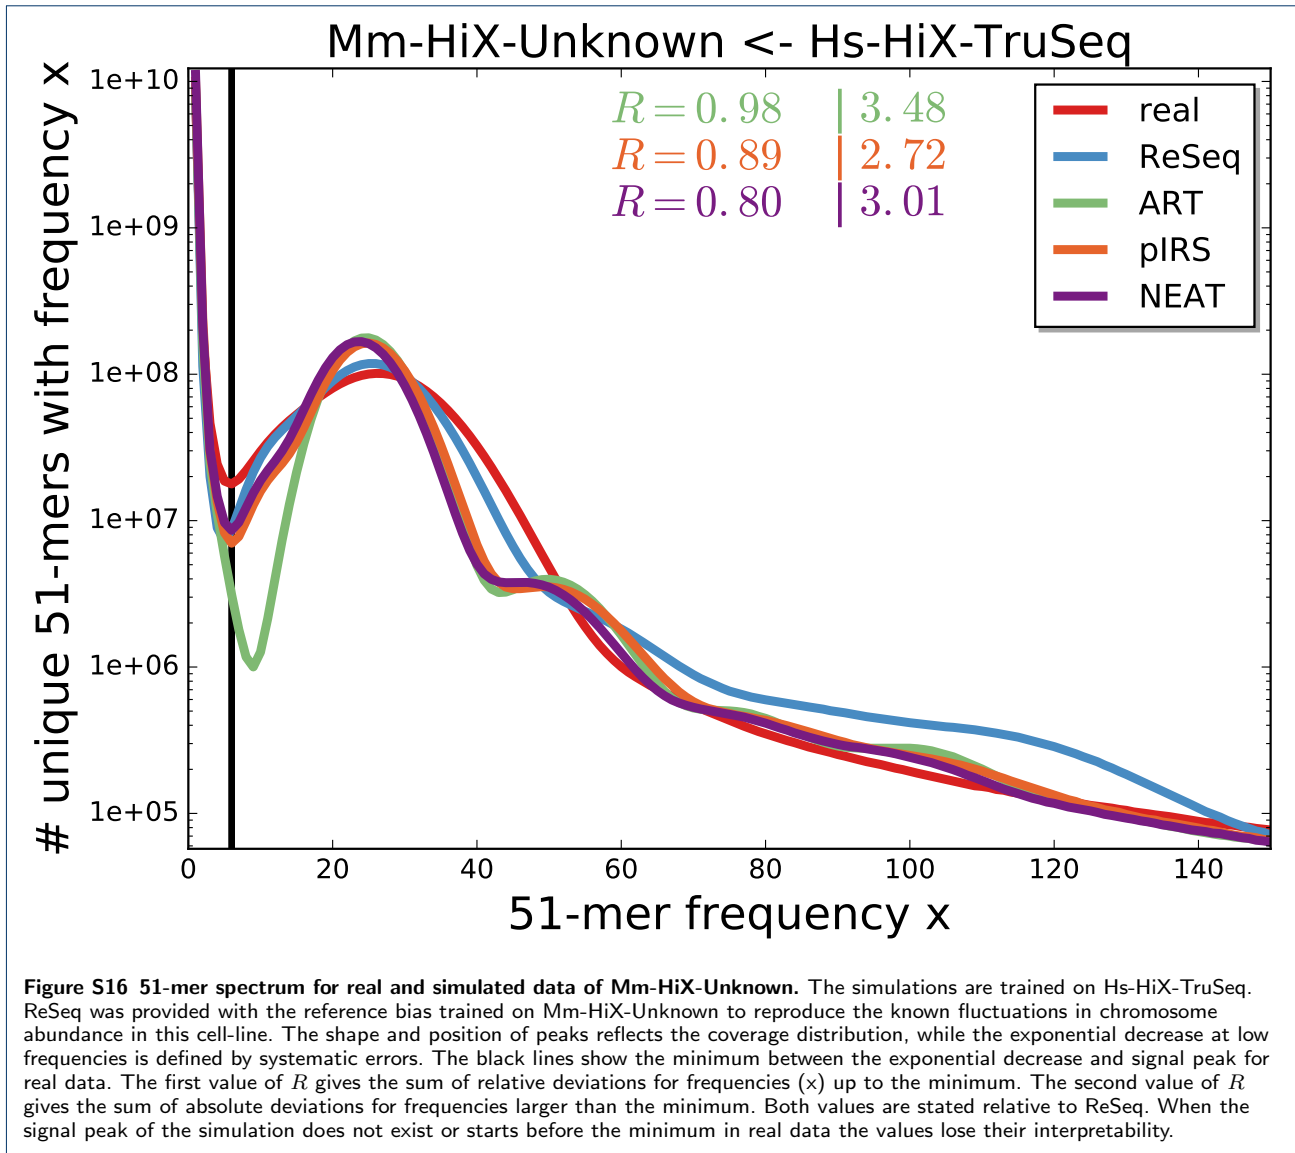

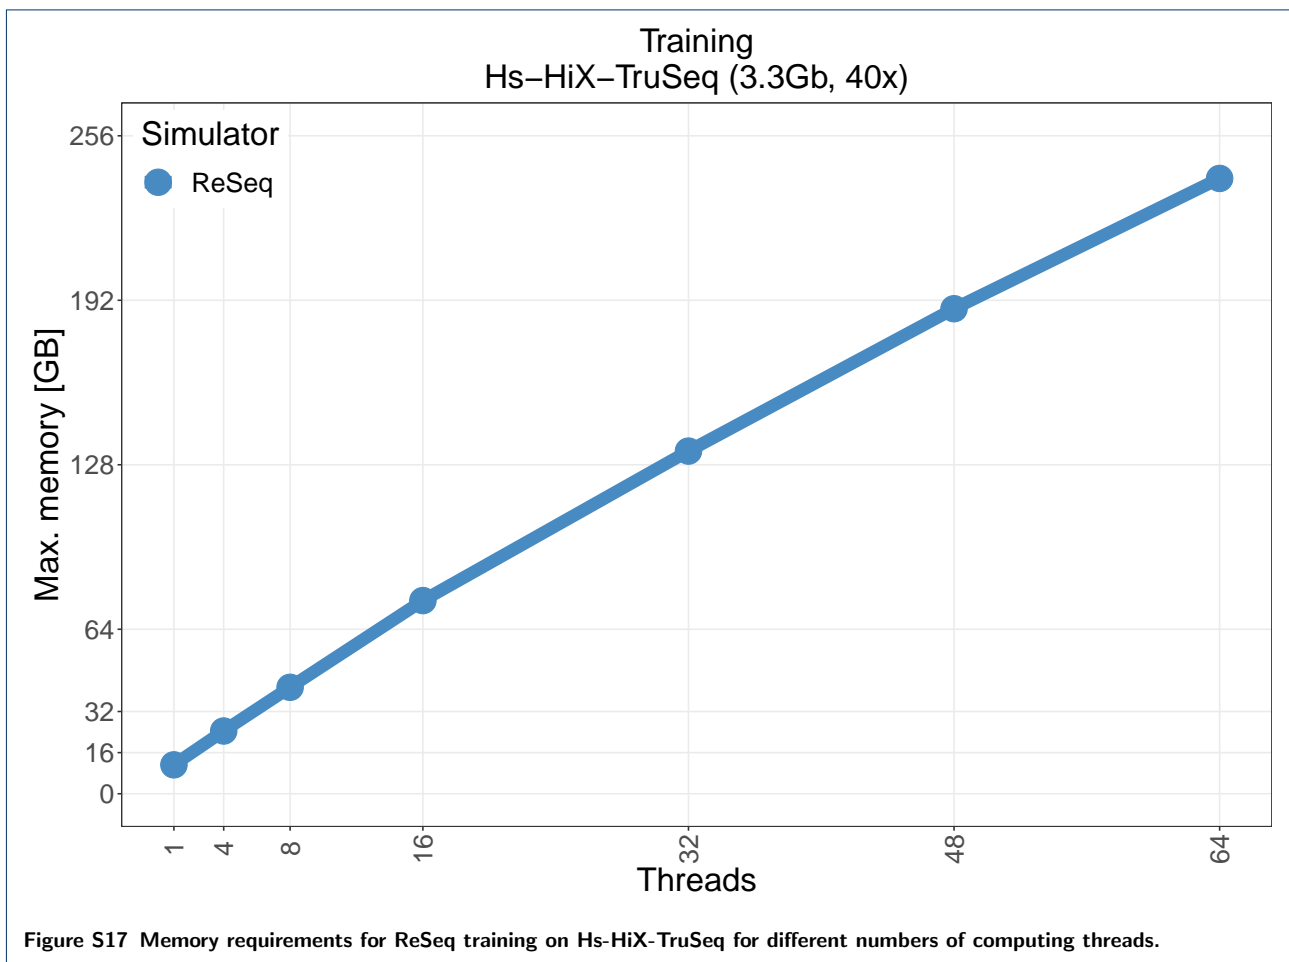



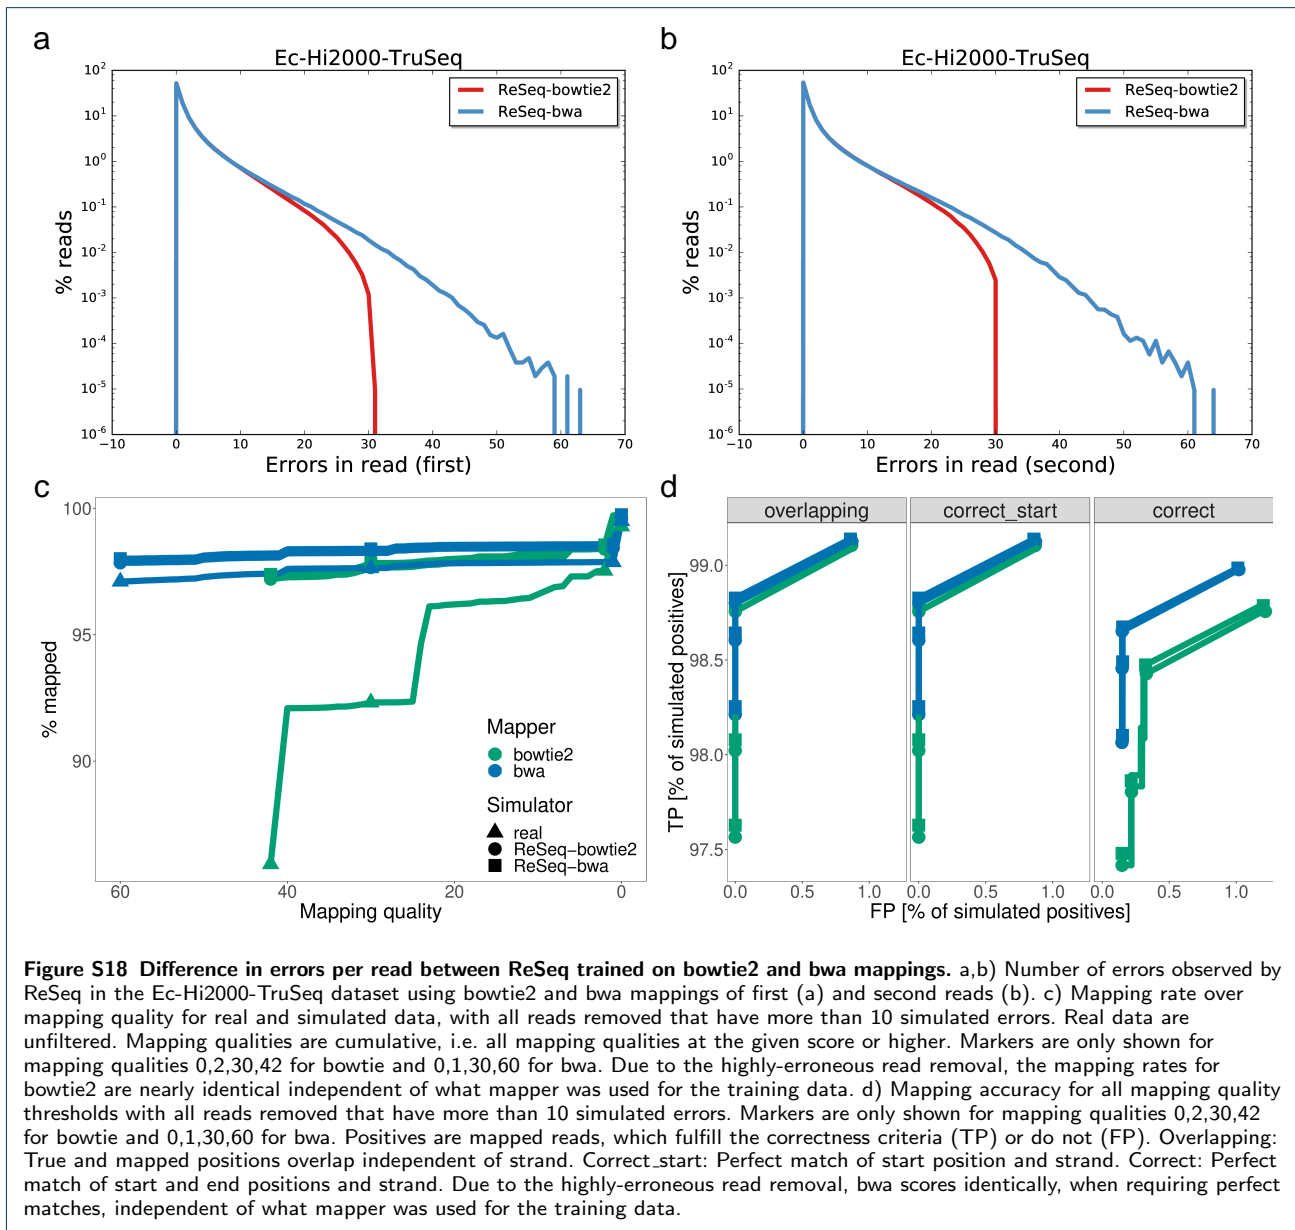

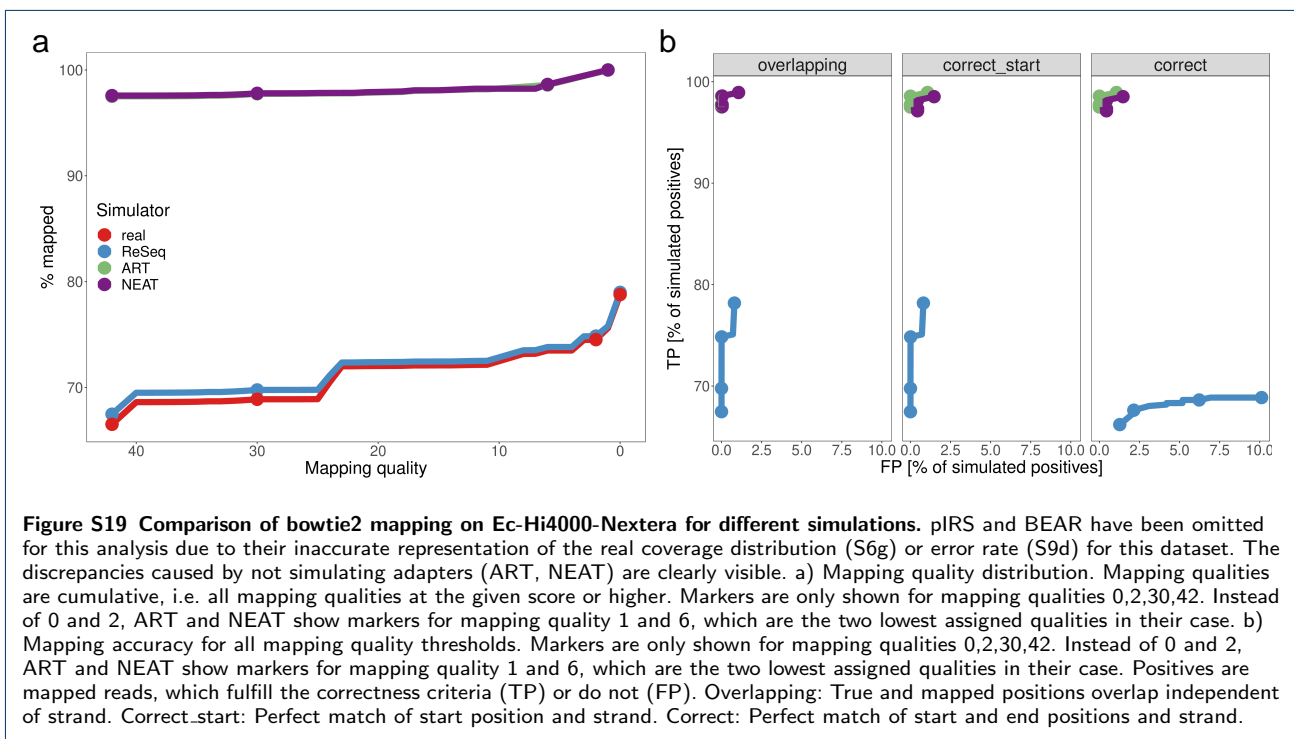

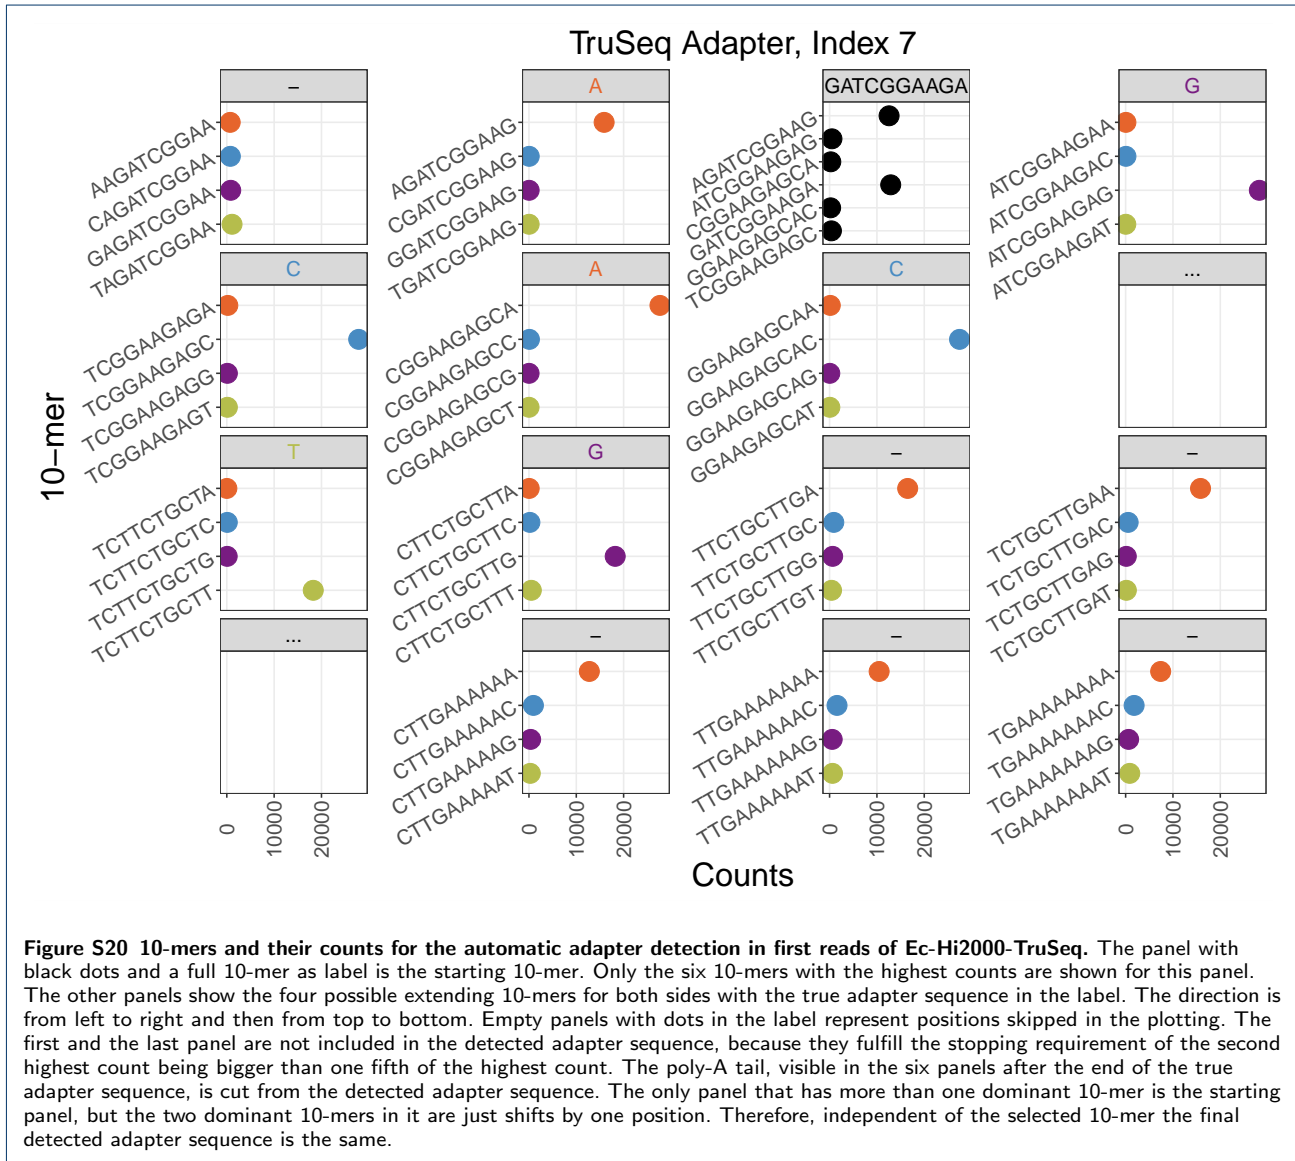

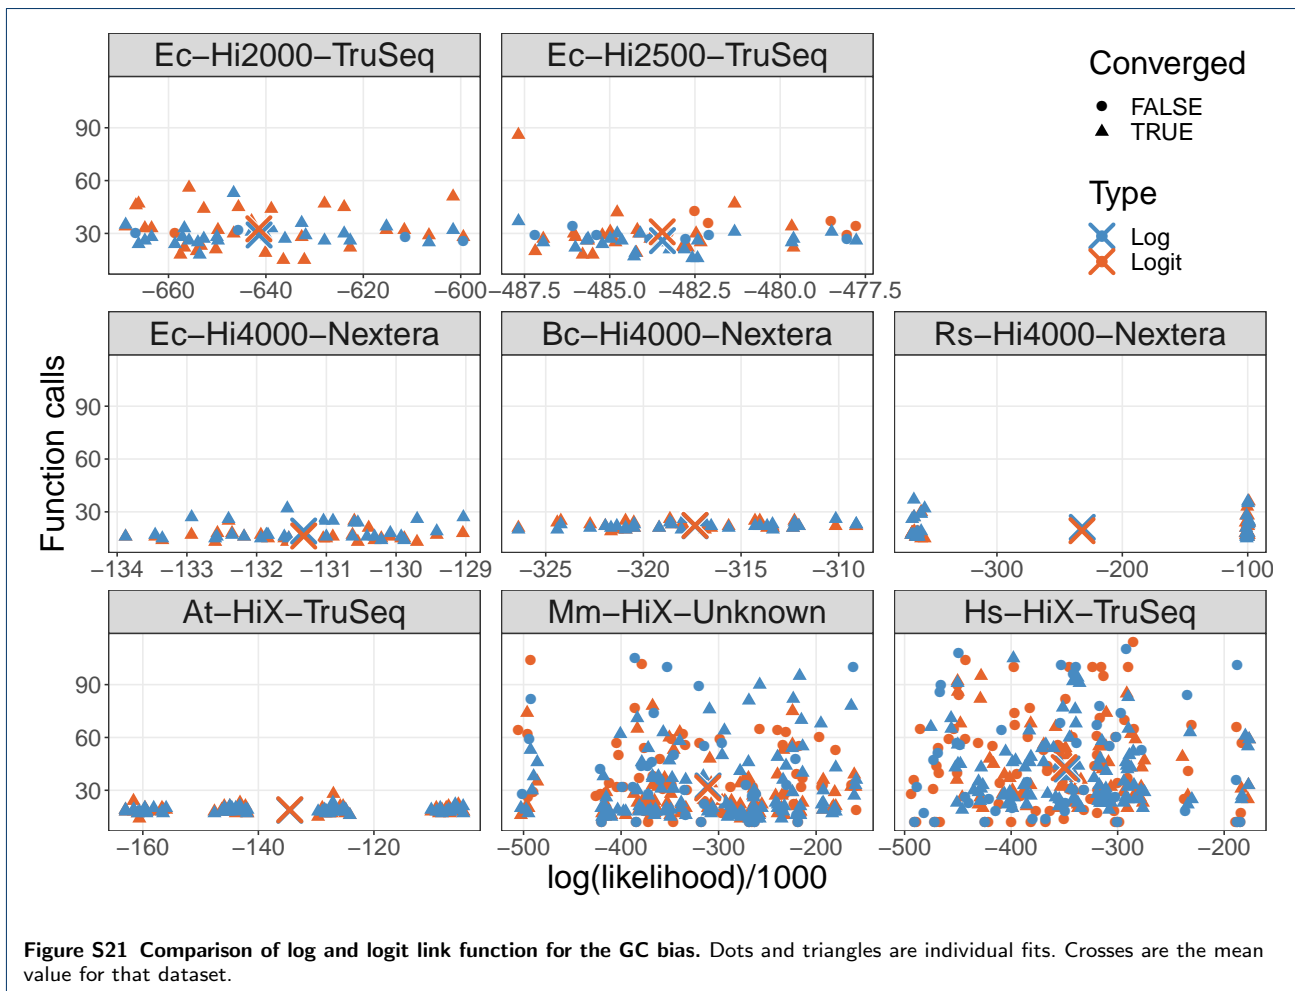

## Supplementary Tables

**Table S1** Used simulator versions.

| Simulator | Version                                  |
|-----------|------------------------------------------|
| ReSeq     | 1.0                                      |
|           | ac75312d263efde27d3655150fae474a5fdbf7d6 |
| pIRS      | 2.0.0                                    |
|           | bee9b594f4d0e10580aae77ec411cecec4a77219 |
| ART       | 2.5.8                                    |
|           | MountRainier-2016-06-05                  |
| NEAT      | v2.0                                     |
|           | cdb869a2451221ab57bffe50329cdd1467c2f    |
| BEAR      | 02274019ce7c2ac70c2f642368bc0682fb97446a |

**Table S2** Used program versions.

| Program        | Version            |
|----------------|--------------------|
| bcl2fastq      | v2.20.0.422        |
| bcftools [2]   | 1.9                |
| bedtools [3]   | v2.25.0            |
| bowtie2 [4]    | 2.2.5              |
| bwa mem [5]    | 0.7.13-r1126       |
| freebayes [6]  | v1.3.1-dirty       |
| GNU time       | 1.7                |
| igv [7, 8]     | 2.6.3              |
| jellyfish [9]  | 2.0.0              |
| kmc [10]       | 3.1.1 (2019-05-19) |
| pilon [11]     | 1.21               |
| preqc [12]     | 0.10.14            |
| quast [13]     | 4.4                |
| samtools [14]  | 1.9                |
| sga [15]       | 0.10.14            |
| snakemake [16] | 3.5.5              |
| soap [17]      | 2.21               |

## Supplementary Formulas

Here the exact likelihood and gradient formulas that are used in the program for the coverage model fit are derived, starting from the formulas and information in the main document. While the formulas from the main document are repeated, only new symbols will be explained.

### Step 1 Poisson

Internally, the normalization  $N$  is always part of the GC bias, because it is absorbed by it for the log-likelihood calculation during this step.

$$\begin{aligned}\mu_n &= Nb_{GC}(GC_n)b_{start,n}b_{end,n} \\ &= b_{GC}^N b_{start,n}b_{end,n} \\ &= b_{GC}^N \hat{\mu}_n\end{aligned}$$

$$L_P = \prod_n \frac{\mu_n^{k_n}}{k_n!} e^{-\mu_n}$$

$$\begin{aligned}\log(L_P) &= \sum_n [k_n \log(\mu_n) - \log(k_n!) - \mu_n] \\ &= \left[ -\sum_n \log(k_n!) \right] + \sum_{GC} \sum_{n(GC)} [k_n \log(b_{GC}^N \hat{\mu}_n) - b_{GC}^N \hat{\mu}_n] \\ &= \left[ -\sum_n \log(k_n!) \right] + \sum_{GC} \sum_{n(GC)} [k_n \log(b_{GC}^N) + k_n \log(\hat{\mu}_n) - b_{GC}^N \hat{\mu}_n] \\ &= \left[ -\sum_n \log(k_n!) \right] + \sum_{GC} \left\{ \log(b_{GC}^N) \left[ \sum_{n(GC)} k_n \right] + \left[ \sum_{n(GC)} k_n \log(\hat{\mu}_n) \right] - b_{GC}^N \left[ \sum_{n(GC)} \hat{\mu}_n \right] \right\}\end{aligned}$$

$$\frac{\partial \log(L_P)}{\partial b_{GC}^N} = \frac{1}{b_{GC}^N} \left[ \sum_{n(GC)} k_n \right] - \left[ \sum_{n(GC)} \hat{\mu}_n \right]$$

$$\begin{aligned}0 = \frac{\partial \log(L_P)}{\partial b_{GC}^N} &\Leftrightarrow \sum_{n(GC)} \hat{\mu}_n = \frac{1}{b_{GC}^N} \sum_{n(GC)} k_n \\ &\Leftrightarrow b_{GC}^N = \frac{\sum_{n(GC)} k_n}{\sum_{n(GC)} \hat{\mu}_n} = \frac{\textcircled{1}}{\textcircled{2}}\end{aligned}$$

In the software, the variable names are  $\textcircled{1}$  gc.count\_[gc] and  $\textcircled{2}$  gc.bias.sum[gc].second. When we use the calculated  $b_{GC}^N$  in the likelihood, we always have perfect normalization, thus the normalization is absorbed by the GC bias.

$$\begin{aligned}\log(L_P) &= \left[ -\sum_n \log(k_n!) \right] + \sum_{GC} \left\{ \left[ \sum_{n(GC)} k_n \log(\hat{\mu}_n) \right] + \left[ \sum_{n(GC)} k_n \right] \log(b_{GC}^N) - \left[ \sum_{n(GC)} k_n \right] \right\} \\ &= \textcircled{3} + \sum_{GC} \left\{ \textcircled{4} + \textcircled{1} \log(b_{GC}^N) - \textcircled{1} \right\}\end{aligned}$$

③ loglike\_poisson\_base\_, ④ gc\_bias\_sum[gc].first. This leaves the  $b_{f,p}$  to be fitted, thus we need their gradients.

$$\frac{\partial b_{GC}^N}{\partial b_{f,p}} = -\frac{b_{GC}^N}{\sum_{n(GC)} \hat{\mu}_n} \sum_{n(GC)} \frac{\partial \hat{\mu}_n}{\partial b_{f,p}}$$

$$\begin{aligned} \frac{\partial \log(LP)}{\partial b_{f,p}} &= \sum_{GC} \left\{ \left[ \sum_{n(GC)} \frac{k_n}{\hat{\mu}_n} \frac{\partial \hat{\mu}_n}{\partial b_{f,p}} \right] + \frac{\sum_{n(GC)} k_n}{b_{GC}^N} \frac{\partial b_{GC}^N}{\partial b_{f,p}} \right\} \\ &= \sum_{GC} \left\{ \left[ \sum_{n(GC)} \frac{k_n}{\hat{\mu}_n} \frac{\partial \hat{\mu}_n}{\partial b_{f,p}} \right] - \left[ \sum_{n(GC)} \hat{\mu}_n \right] \frac{b_{GC}^N}{\sum_{n(GC)} \hat{\mu}_n} \sum_{n(GC)} \frac{\partial \hat{\mu}_n}{\partial b_{f,p}} \right\} \\ &= \left[ \sum_n \frac{k_n}{\hat{\mu}_n} \frac{\partial \hat{\mu}_n}{\partial b_{f,p}} \right] - \left\{ \sum_{GC} b_{GC}^N \sum_{n(GC)} \left[ \frac{\partial \hat{\mu}_n}{\partial b_{f,p}} \right] \right\} \\ &= \textcircled{5} - \left\{ \sum_{GC} b_{GC}^N \sum_{n(GC)} \textcircled{6} \right\} \end{aligned}$$

⑤ grad\_sur\_[sur], ⑥ grad\_gc\_bias\_sum[gc][sur]

For the sum version of the flanking bias, this leads to the following:

$$b_{start,n} = \frac{2}{1 + e^{-\sum_p b_{f(p,start),p}}}$$

$$\begin{aligned} \frac{\partial b_{start,n}}{\partial b_{f,p}} &= -\frac{b_{start,n}}{1 + e^{-\sum_{\bar{p}} b_{f(\bar{p},start),\bar{p}}}} e^{-\sum_{\bar{p}} b_{f(\bar{p},start),\bar{p}}} (-\delta_{f(\bar{p},start),f}) \\ &= b_{start,n} \delta_{f(\bar{p},start),f} \frac{e^{-\sum_{\bar{p}} b_{f(\bar{p},start),\bar{p}}} + 1 - 1}{1 + e^{-\sum_{\bar{p}} b_{f(\bar{p},start),\bar{p}}}} \\ &= b_{start,n} \delta_{f(\bar{p},start),f} \left( 1 - \frac{1}{1 + e^{-\sum_{\bar{p}} b_{f(\bar{p},start),\bar{p}}}} \right) \\ &= b_{start,n} \delta_{f(\bar{p},start),f} \left( 1 - \frac{b_{start,n}}{2} \right) \end{aligned}$$

$$\begin{aligned} \frac{\partial \hat{\mu}_n}{\partial b_{f,p}} &= \frac{\partial b_{start,n}}{\partial b_{f,p}} b_{end,n} + b_{start,n} \frac{\partial b_{end,n}}{\partial b_{f,p}} \\ &= b_{start,n} \delta_{f(\bar{p},start),f} \left( 1 - \frac{b_{start,n}}{2} \right) b_{end,n} + b_{start,n} b_{end,n} \delta_{f(\bar{p},end),f} \left( 1 - \frac{b_{end,n}}{2} \right) \\ &= \hat{\mu}_n \left[ \delta_{f(\bar{p},start),f} \left( 1 - \frac{b_{start,n}}{2} \right) + \delta_{f(\bar{p},end),f} \left( 1 - \frac{b_{end,n}}{2} \right) \right] \end{aligned}$$

$$\begin{aligned} \frac{\partial \log(LPS)}{\partial b_{f,p}} &= \left[ \sum_n k_n \left[ \delta_{f(\bar{p},start),f} \left( 1 - \frac{b_{start,n}}{2} \right) + \delta_{f(\bar{p},end),f} \left( 1 - \frac{b_{end,n}}{2} \right) \right] \right] \\ &\quad - \left\{ \sum_{GC} b_{GC}^N \left[ \sum_{n(GC)} \hat{\mu}_n \left[ \delta_{f(\bar{p},start),f} \left( 1 - \frac{b_{start,n}}{2} \right) + \delta_{f(\bar{p},end),f} \left( 1 - \frac{b_{end,n}}{2} \right) \right] \right] \right\} \end{aligned}$$

Inspired by biases of the four nucleotides at a position not being independent, we do not directly use  $b_{f,p}$  as fit parameters, but  $\tilde{b}_{f,p}$ . However, we still have 4 parameters per position, because our attempts to reduce this to 3 did not improve the fitting.

$$b_{f,p} = \tilde{b}_{f,p} - \frac{\sum_{\tilde{s}} \tilde{b}_{\tilde{s},p}}{4} + \delta_{p0} \tilde{b}_{shift}$$

$\tilde{b}_{shift}$  is an additional parameter that can shift the spread of different  $\sum_p b_{f(p,start),p}$  to an ideal range for the inverse logit transformation.

$$\begin{aligned} \frac{\partial \log(L_{PS})}{\partial \tilde{b}_{f,p}} &= \sum_{\tilde{s}} \frac{\partial b_{\tilde{s},p}}{\partial \tilde{b}_{f,p}} \frac{\partial \log(L_P)}{\partial b_{\tilde{s},p}} \\ &= \frac{\partial \log(L_P)}{\partial b_{f,p}} - \frac{\sum_{\tilde{s}} \frac{\partial \log(L_P)}{\partial b_{\tilde{s},p}}}{4} \end{aligned}$$

$$\begin{aligned} \frac{\partial \log(L_{PS})}{\partial \tilde{b}_{shift}} &= \sum_{\tilde{s}} \frac{\partial b_{\tilde{s},0}}{\partial \tilde{b}_{shift}} \frac{\partial \log(L_P)}{\partial b_{\tilde{s},0}} \\ &= \sum_{\tilde{s}} \frac{\partial \log(L_P)}{\partial b_{\tilde{s},0}} \end{aligned}$$

For the product version of the flanking bias, the likelihood and gradients are the following.

$$b_{start,n} = \prod_p b_{f(p,start),p}$$

$$\frac{\partial b_{start,n}}{\partial b_{f,p}} = \delta_{f(p,start),f} \frac{b_{start,n}}{b_{f,p}}$$

$$\begin{aligned} \frac{\partial \hat{\mu}_n}{\partial b_{f,p}} &= \frac{\partial b_{start,n}}{\partial b_{f,p}} b_{end,n} + b_{start,n} \frac{\partial b_{end,n}}{\partial b_{f,p}} \\ &= \delta_{f(p,start),f} \frac{b_{start,n}}{b_{f,p}} b_{end,n} + b_{start,n} \delta_{f(p,end),f} \frac{b_{end,n}}{b_{f,p}} \\ &= \frac{\hat{\mu}_n}{b_{f,p}} (\delta_{f(p,start),f} + \delta_{f(p,end),f}) \end{aligned}$$

$$\begin{aligned} \frac{\partial \log(L_{PP})}{\partial b_{f,p}} &= \left[ \sum_n \frac{k_n}{b_{f,p}} (\delta_{f(\tilde{p},start),f} + \delta_{f(\tilde{p},end),f}) \right] \\ &\quad - \left\{ \sum_{GC} b_{GC}^N \left[ \sum_{n(GC)} \frac{\hat{\mu}_n}{b_{f,p}} (\delta_{f(\tilde{p},start),f} + \delta_{f(\tilde{p},end),f}) \right] \right\} \end{aligned}$$

Similar to the sum version, the real fit parameters are  $\tilde{b}_{f,p}$ .

$$b_{f,p} = \frac{4\tilde{b}_{f,p}}{\sum_{\tilde{s}} \tilde{b}_{\tilde{s},p}}$$



$$\begin{aligned}
\frac{\partial b_{s,p}}{\partial \tilde{b}_{f,p}} &= 4 \frac{\delta_{s,f} \left[ \sum_{\tilde{s}} \tilde{b}_{\tilde{s},p} \right] - \tilde{b}_{s,p}}{\left[ \sum_{\tilde{s}} \tilde{b}_{\tilde{s},p} \right]^2} \\
&= \frac{4\delta_{s,f} - \frac{4\tilde{b}_{s,p}}{\sum_{\tilde{s}} \tilde{b}_{\tilde{s},p}}}{\sum_{\tilde{s}} \tilde{b}_{\tilde{s},p}} \\
&= \frac{4\delta_{s,f} - b_{s,p}}{\sum_{\tilde{s}} \tilde{b}_{\tilde{s},p}}
\end{aligned}$$

$$\begin{aligned}
\frac{\partial \log(L_{PP})}{\partial \tilde{b}_{f,p}} &= \sum_s \frac{\partial b_{s,p}}{\partial \tilde{b}_{f,p}} \frac{\partial \log(L_P)}{\partial b_{s,p}} \\
&= \frac{4 \frac{\partial \log(L_P)}{\partial b_{f,p}} - \left[ \sum_s b_{s,p} \frac{\partial \log(L_P)}{\partial b_{s,p}} \right]}{\sum_{\tilde{s}} \tilde{b}_{\tilde{s},p}}
\end{aligned}$$

Step 2 GC bias spline

$$b_{GC,spline}(GC) = c_1(GC) + c_2(GC)x(GC) + c_3(GC)x^2(GC) + c_4(GC)x^3(GC)$$

$$c_l(GC) = \sum_{j=1}^6 t_{l,j}(GC) s_j$$

$s_j$  are the six spline parameters,  $t_{l,j}(GC)$  are coefficients calculated from the knot positions and  $x(GC)$  is the distance to the last knot.

$$\frac{\partial b_{GC,spline}(GC)}{\partial s_{\tilde{j}}} = t_{1,\tilde{j}}(GC) + t_{2,\tilde{j}}(GC)x(GC) + t_{3,\tilde{j}}(GC)x^2(GC) + t_{4,\tilde{j}}(GC)x^3(GC)$$

The likelihood is the Poisson likelihood without the substitution of  $b_{GC}^N$

$$\begin{aligned}
\log(L_B) &= \left[ -\sum_n \log(k_n!) \right] + \sum_{GC} \left\{ \left[ \sum_{n(GC)} k_n \log(\hat{\mu}_n) \right] + \left[ \sum_{n(GC)} k_n \right] \log(b_{GC}^N) - b_{GC}^N \left[ \sum_{n(GC)} \hat{\mu}_n \right] \right\} \\
&= \textcircled{3} + \sum_{GC} \left\{ \textcircled{4} + \textcircled{1} \log(b_{GC}^N) - b_{GC}^N \textcircled{2} \right\}
\end{aligned}$$

$$\begin{aligned}
\frac{\partial \log(L_B)}{\partial s_{\tilde{j}}} &= \frac{\partial \log(L_B)}{\partial b_{GC}^N} \frac{\partial b_{GC}^N}{\partial b_{GC,spline}} \frac{\partial b_{GC,spline}}{\partial s_{\tilde{j}}} \\
&= \sum_{GC} \left\{ \left( \frac{1}{b_{GC}^N} \left[ \sum_{n(GC)} k_n \right] - \left[ \sum_{n(GC)} \hat{\mu}_n \right] \right) \frac{\partial b_{GC}^N}{\partial b_{GC,spline}} \frac{\partial b_{GC,spline}}{\partial s_{\tilde{j}}} \right\} \\
&= \sum_{GC} \left\{ \left( \left[ \sum_{n(GC)} k_n \right] - b_{GC}^N \left[ \sum_{n(GC)} \hat{\mu}_n \right] \right) \left( \frac{1}{b_{GC}^N} \frac{\partial b_{GC}^N}{\partial b_{GC,spline}} \right) \frac{\partial b_{GC,spline}}{\partial s_{\tilde{j}}} \right\}
\end{aligned}$$

For the exponential version:

$$b_{GC}^N = N e^{b_{GC,spline}}$$

$$\frac{\partial b_{GC}^N}{\partial b_{GC,spline}} = b_{GC}^N$$

For the inverse logit version:

$$b_{GC}^N = \frac{2N}{1 + e^{-b_{GC,spline}}}$$

$$\begin{aligned} \frac{\partial b_{GC}^N}{\partial b_{GC,spline}} &= -2N \frac{-e^{-b_{GC,spline}}}{(1 + e^{-b_{GC,spline}})^2} \\ &= b_{GC}^N \frac{e^{-b_{GC,spline}}}{1 + e^{-b_{GC,spline}}} \\ &= b_{GC}^N \frac{1}{1 + e^{b_{GC,spline}}} \end{aligned}$$

### Step 3 Negative binomial

$$L_{NB} = \prod_n \left\{ \binom{k_n + r_n - 1}{k_n} \left(1 - \frac{\mu_n}{\mu_n + r_n}\right)^{r_n} \left(\frac{\mu_n}{\mu_n + r_n}\right)^{k_n} \right\}$$

$$r_n = \frac{\mu_n}{\alpha + \beta\mu_n}$$

$$\begin{aligned} \frac{\partial r_n}{\partial \mu_n} &= \frac{\alpha + \beta\mu_n - \mu_n\beta}{(\alpha + \beta\mu_n)^2} \\ &= \frac{\alpha}{(\alpha + \beta\mu_n)^2} \\ &= \frac{\alpha r_n^2}{\mu_n^2} \end{aligned}$$

$$\begin{aligned} \log(L_{NB}) &= \sum_n \left\{ \log \left( \prod_{i=1}^{k_n} \frac{k_n + r_n - 1 + 1 - i}{i} \right) + r_n \log \left( 1 - \frac{\mu_n}{\mu_n + r_n} \right) + k_n \log \left( \frac{\mu_n}{\mu_n + r_n} \right) \right\} \\ &= \sum_n \left\{ \left[ \sum_{i=1}^{k_n} \log \left( \frac{k_n + r_n - i}{i} \right) \right] + r_n \log \left( \frac{r_n}{\mu_n + r_n} \right) + k_n \log \left( \frac{\mu_n}{\mu_n + r_n} \right) \right\} \\ &= \sum_n \left\{ \left[ \sum_{i=1}^{k_n} \log (k_n + r_n - (k_n - i + 1)) \right] - \left[ \sum_{i=1}^{k_n} \log (i) \right] + r_n \log \left( \frac{r_n}{\mu_n + r_n} \right) + k_n \log \left( \frac{\mu_n}{\mu_n + r_n} \right) \right\} \\ &= \sum_n \left\{ \left[ \sum_{i=1}^{k_n} \log \left( \frac{r_n + i - 1}{i} \right) \right] + r_n \log \left( \frac{r_n}{\mu_n + r_n} \right) + k_n \log \left( \frac{\mu_n}{\mu_n + r_n} \right) \right\} \\ &= \sum_n \left\{ k_n \log \left( \frac{\mu_n}{\mu_n + r_n} \right) + r_n \log \left( \frac{r_n}{\mu_n + r_n} \right) + \left[ \sum_{i=1}^{k_n} \log \left( \frac{r_n + (i - 1)}{i} \right) \right] \right\} \end{aligned}$$

$$\begin{aligned}
\frac{\partial \log(L_{NB})}{\partial \mu_n} &= \sum_n \left\{ \left[ k_n \frac{\mu_n + r_n}{\mu_n} \frac{(\mu_n + r_n) - \mu_n \left(1 + \frac{\partial r_n}{\partial \mu_n}\right)}{(\mu_n + r_n)^2} \right] \right. \\
&\quad + \left[ \frac{\partial r_n}{\partial \mu_n} \log\left(\frac{r_n}{\mu_n + r_n}\right) + r_n \frac{\mu_n + r_n}{r_n} \frac{\frac{\partial r_n}{\partial \mu_n} (\mu_n + r_n) - r_n \left(1 + \frac{\partial r_n}{\partial \mu_n}\right)}{(\mu_n + r_n)^2} \right] \\
&\quad \left. + \left[ \sum_{i=1}^{k_n} \frac{i}{r_n + i - 1} \frac{\partial r_n}{i} \right] \right\} \\
&= \sum_n \left\{ \left[ k_n \frac{r_n - \mu_n \frac{\partial r_n}{\partial \mu_n}}{\mu_n (\mu_n + r_n)} \right] + \left[ \frac{\mu_n \frac{\partial r_n}{\partial \mu_n} - r_n}{\mu_n + r_n} + \frac{\partial r_n}{\partial \mu_n} \log\left(\frac{r_n}{\mu_n + r_n}\right) \right] + \left[ \sum_{i=1}^{k_n} \frac{\frac{\partial r_n}{\partial \mu_n}}{r_n + i - 1} \right] \right\} \\
&= \sum_n \left\{ \frac{(k_n - \mu_n) \left(r_n - \mu_n \frac{\partial r_n}{\partial \mu_n}\right)}{\mu_n (\mu_n + r_n)} + \frac{\partial r_n}{\partial \mu_n} \log\left(\frac{r_n}{\mu_n + r_n}\right) + \left[ \frac{\partial r_n}{\partial \mu_n} \sum_{i=1}^{k_n} \frac{1}{r_n + i - 1} \right] \right\} \\
&= \sum_n \left\{ \frac{(k_n - \mu_n) \left(r_n - \mu_n \frac{\alpha r_n^2}{\mu_n^2}\right)}{\mu_n (\mu_n + r_n)} + \frac{\alpha r_n^2}{\mu_n^2} \log\left(\frac{r_n}{\mu_n + r_n}\right) + \left[ \frac{\alpha r_n^2}{\mu_n^2} \sum_{i=1}^{k_n} \frac{1}{r_n + i - 1} \right] \right\} \\
&= \sum_n \left\{ \frac{r_n (k_n - \mu_n)}{\mu_n (\mu_n + r_n)} \left(1 - \frac{\alpha r_n}{\mu_n}\right) + \left[ \log\left(\frac{r_n}{\mu_n + r_n}\right) + \sum_{i=1}^{k_n} \frac{1}{r_n + i - 1} \right] r_n^2 \frac{\alpha}{\mu_n^2} \right\} \\
&= \sum_n \left\{ \left( \frac{r_n (k_n - \mu_n)}{\mu_n + r_n} \left(1 - \frac{\alpha r_n}{\mu_n}\right) + \left[ \log\left(\frac{1}{\frac{\mu_n}{r_n} + 1}\right) + \sum_{i=1}^{k_n} \frac{1}{r_n + (i - 1)} \right] r_n^2 \frac{\alpha}{\mu_n} \right) \frac{1}{\mu_n} \right\}
\end{aligned}$$

$$\begin{aligned}
\frac{\partial \log(L_{NB})}{\partial s_j} &= \frac{\partial \log(L_B)}{\partial \mu_n} \frac{\partial \mu_n}{\partial b_{GC}^N} \frac{\partial b_{GC}^N}{\partial b_{GC,spline}} \frac{\partial b_{GC,spline}}{\partial s_j} \\
&= \left[ \frac{\partial \log(L_B)}{\partial \mu_n} \mu_n \right] \left[ \frac{1}{b_{GC}^N} \frac{\partial b_{GC}^N}{\partial b_{GC,spline}} \right] \frac{\partial b_{GC,spline}}{\partial s_j}
\end{aligned}$$

$$\frac{\partial \log(L_{NB})}{\partial b_{f,p}} = \left[ \frac{\partial \log(L_B)}{\partial \mu_n} \mu_n \right] \left[ \frac{1}{\mu_n} \frac{\partial \mu_n}{\partial b_{f,p}} \right]$$

$$\begin{aligned}
\frac{\partial \log(L_{NB})}{\partial r_n} &= \sum_n \left\{ \left[ k_n \frac{\mu_n + r_n}{\mu_n} \frac{-\mu_n}{(\mu_n + r_n)^2} \right] \right. \\
&\quad + \left[ \log\left(\frac{r_n}{\mu_n + r_n}\right) + r_n \frac{\mu_n + r_n}{r_n} \frac{(\mu_n + r_n) - r_n}{(\mu_n + r_n)^2} \right] \\
&\quad \left. + \left[ \sum_{i=1}^{k_n} \frac{i}{r_n + i - 1} \frac{1}{i} \right] \right\} \\
&= \sum_n \left\{ \left[ \frac{-k_n}{\mu_n + r_n} \right] + \left[ \frac{\mu_n}{\mu_n + r_n} + \log\left(\frac{r_n}{\mu_n + r_n}\right) \right] + \left[ \sum_{i=1}^{k_n} \frac{1}{r_n + i - 1} \right] \right\} \\
&= \sum_n \left\{ \frac{\mu_n - k_n}{\mu_n + r_n} + \log\left(\frac{1}{\frac{\mu_n}{r_n} + 1}\right) + \left[ \sum_{i=1}^{k_n} \frac{1}{r_n + (i - 1)} \right] \right\}
\end{aligned}$$

$$\frac{\partial r_n}{\partial \alpha} = \frac{-\mu_n}{(\alpha + \beta \mu)^2} = \frac{-r_n^2}{\mu_n}$$

$$\begin{aligned} \frac{\partial \log(L_{NB})}{\partial \alpha} &= \frac{\partial \log(L_B)}{\partial r_n} \frac{\partial r_n}{\partial \alpha} \\ &= \left\{ \frac{r_n^2 k_n - \mu_n}{\mu_n \mu_n + r_n} - \left[ \log \left( \frac{1}{\frac{\mu_n}{r_n} + 1} \right) + \sum_{i=1}^{k_n} \frac{1}{r_n + (i-1)} \right] \frac{r_n^2}{\mu_n} \right\} \end{aligned}$$

$$\frac{\partial r_n}{\partial \beta} = \frac{-\mu_n^2}{(\alpha + \beta\mu)^2} = -r_n^2$$

$$\begin{aligned} \frac{\partial \log(L_{NB})}{\partial \beta} &= \frac{\partial \log(L_B)}{\partial r_n} \frac{\partial r_n}{\partial \beta} \\ &= \left\{ r_n^2 \frac{k_n - \mu_n}{\mu_n + r_n} - \left[ \log \left( \frac{1}{\frac{\mu_n}{r_n} + 1} \right) + \sum_{i=1}^{k_n} \frac{1}{r_n + (i-1)} \right] r_n^2 \right\} \end{aligned}$$

## References

1. Wingett, S.: Illumina Patterned Flow Cells Generate Duplicated Sequences. <https://sequencing.qcfail.com/articles/illumina-patterned-flow-cells-generate-duplicated-sequences/> Accessed 2020-04-28
2. Li, H.: A statistical framework for SNP calling, mutation discovery, association mapping and population genetical parameter estimation from sequencing data. *Bioinformatics* **27**(21), 2987–2993 (2011)
3. Quinlan, A.R., Hall, I.M.: BEDTools: a flexible suite of utilities for comparing genomic features. *Bioinformatics* **26**(6), 841–842 (2010)
4. Langmead, B., Salzberg, S.L.: Fast gapped-read alignment with Bowtie 2. *Nat. Methods* **9**(4), 357–359 (2012)
5. H., L.: Aligning sequence reads, clone sequences and assembly contigs with bwa-mem. *arXiv* **1303.3997v2** (2013)
6. Garrison E, M.G.: Haplotype-based variant detection from short-read sequencing. *arXiv* **1207.3907** (2012)
7. Robinson, J.T., Thorvaldsdóttir, H., Winckler, W., Guttman, M., Lander, E.S., Getz, G., Mesirov, J.P.: Integrative genomics viewer. *Nature Biotechnology* **29**, 24–26 (2011)
8. Thorvaldsdóttir, H., Robinson, J.T., Mesirov, J.P.: Integrative genomics viewer (igv): high-performance genomics data visualization and exploration. *Briefings in Bioinformatics* **14**, 178–192 (2013)
9. Marçais, G., Kingsford, C.: A fast, lock-free approach for efficient parallel counting of occurrences of k-mers. *Bioinformatics* **27**(6), 764–770 (2011)
10. Kokot, M., Dlugosz, M., Deorowicz, S.: KMC 3: counting and manipulating k-mer statistics. *Bioinformatics* **33**(17), 2759–2761 (2017)
11. Walker, B.J., Abeel, T., Shea, T., Priest, M., Abouelliel, A., Sakthikumar, S., Cuomo, C.A., Zeng, Q., Wortman, J., Young, S.K., Earl, A.M.: Pilon: an integrated tool for comprehensive microbial variant detection and genome assembly improvement. *PLoS ONE* **9**(11), 112963 (2014)
12. Simpson, J.T.: Exploring genome characteristics and sequence quality without a reference. *Bioinformatics* **30**(9), 1228–1235 (2014)
13. Gurevich, A., Saveliev, V., Vyahhi, N., Tesler, G.: QUAST: quality assessment tool for genome assemblies. *Bioinformatics* **29**(8), 1072–1075 (2013)
14. Li, H., Handsaker, B., Wysoker, A., Fennell, T., Ruan, J., Homer, N., Marth, G., Abecasis, G., Durbin, R.: The Sequence Alignment/Map format and SAMtools. *Bioinformatics* **25**(16), 2078–2079 (2009)
15. Simpson, J.T., Durbin, R.: Efficient de novo assembly of large genomes using compressed data structures. *Genome Res.* **22**(3), 549–556 (2012)
16. Köster, J., Rahmann, S.: Snakemake—a scalable bioinformatics workflow engine. *Bioinformatics* **28**(19), 2520–2522 (2012)
17. Li, R., Yu, C., Li, Y., Lam, T.W., Yiu, S.M., Kristiansen, K., Wang, J.: SOAP2: an improved ultrafast tool for short read alignment. *Bioinformatics* **25**(15), 1966–1967 (2009)
